# Supplementary material for: Beagle dogs living in household or controlled environments show different gut microbiome profiles when fed an identical diet or diet type
Source: Research Square preprint supplement (doi:10.21203/rs.3.rs-3167499/v1), 2023-07-24
Supplement: Supplementary file 1 [file 85d2d2e7562de52e3356dd5f.xlsx]

## Sheet: Sheet1
Table 3. Results of generalized linear model testing the difference in KEGG feature abundance by cohort controlling for diet type in discriminant functional features identified by LEfSe among pairs of the three cohorts. (* = p-value < 0.05, ** = p-value < 0.01, *** = p-value < 0.001)
Function				Pet Mean (SD) n=54	Kennel Mean (SD) n=39	UIUC Mean (SD) n=34	pval_cohort_list	Tukey HSD Pairwise Cohort Differences [95% Confidence Interval]			Pairwise LEfSe Results (Linear Discriminant Analysis Score [Higher Abundant Group])
Level 1	Level 2	Level 3	Identification number					Kennel-Pet	UIUC-Pet	UIUC-Kennel	Kennel-Pet	UIUC-Pet	UIUC-Kennel
Cellular_Processes	Cell_growth_and_death	Cell_cycle__Caulobacter	ko04112	4.04 (0.81)	4.53 (0.935)	4.23 (1.04)	0.0377	0.488 [0.0416, 0.934]*	0.187 [-0.278, 0.652]	-0.301 [-0.799, 0.197]	3.25* [Kennel]	--	--
Cellular_Processes	Cell_motility	-	-	4.07 (0.591)	3.78 (0.449)	3.83 (0.669)	0.0326	-0.293 [-0.578, -0.00856]*	-0.241 [-0.538, 0.0553]	0.052 [-0.266, 0.37]	3.52*** [Pet]	--	--
Cellular_Processes	Cellular_community__prokaryotes	Biofilm_formation__Pseudomonas_aeruginosa	ko02025	3.57 (0.988)	3.07 (0.988)	3.93 (0.91)	0.00101	-0.499 [-0.979, -0.0192]*	0.354 [-0.147, 0.854]	0.853 [0.317, 1.39]***	2.89*** [Pet]	--	3.00*** [UIUC]
Environmental_Information_Processing	Signal_transduction	FoxO_signaling_pathway	ko04068	2.78 (0.982)	1.85 (0.886)	2.56 (1.35)	0.000104	-0.934 [-1.44, -0.427]***	-0.223 [-0.751, 0.305]	0.711 [0.145, 1.28]**	2.67*** [Pet]	--	--
Environmental_Information_Processing	Signal_transduction	MAPK_signaling_pathway__fly	ko04013	2.62 (0.877)	2.15 (0.924)	1.87 (0.945)	0.00054	-0.471 [-0.913, -0.0287]*	-0.749 [-1.21, -0.288]***	-0.278 [-0.772, 0.215]	3.00*** [Pet]	2.23** [Pet]	--
Environmental_Information_Processing	Signal_transduction	MAPK_signaling_pathway__yeast	ko04011	2.48 (1.19)	1.21 (1.04)	1.72 (1.49)	9.17e-07	-1.27 [-1.82, -0.723]***	-0.762 [-1.33, -0.189]**	0.51 [-0.103, 1.12]	2.69*** [Pet]	2.49*** [Pet]	--
Genetic_Information_Processing	Replication_and_repair	Nucleotide_excision_repair	ko03420	4.21 (0.968)	4.87 (0.881)	4.01 (1.02)	0.000405	0.66 [0.18, 1.14]**	-0.195 [-0.695, 0.304]	-0.855 [-1.39, -0.32]***	3.42** [Kennel]	--	3.37* [Kennel]
Metabolism	Amino_acid_metabolism	Lysine_degradation	ko00310	3.69 (1.04)	3.78 (0.821)	2.98 (0.934)	0.000656	0.0865 [-0.385, 0.558]	-0.708 [-1.2, -0.216]**	-0.794 [-1.32, -0.267]**	--	3.04** [Pet]	--
Metabolism	Amino_acid_metabolism	Tryptophan_metabolism	ko00380	3.63 (1.01)	2.85 (1.01)	3.54 (0.868)	0.000334	-0.777 [-1.24, -0.309]***	-0.0893 [-0.577, 0.398]	0.688 [0.165, 1.21]**	3.06*** [Pet]	--	--
Metabolism	Biosynthesis_of_other_secondary_metabolites	Betalain_biosynthesis	ko00965	1.8 (1.26)	0.908 (1.04)	0.835 (1.06)	6.02e-05	-0.888 [-1.45, -0.329]***	-0.961 [-1.54, -0.379]***	-0.0734 [-0.697, 0.55]	2.79*** [Pet]	2.36** [Pet]	--
Metabolism	Biosynthesis_of_other_secondary_metabolites	Biosynthesis_of_various_other_secondary_metabolites	ko00997	2.01 (1.2)	0.612 (0.733)	1.11 (1.24)	2.03e-09	-1.4 [-1.89, -0.904]***	-0.898 [-1.41, -0.382]***	0.501 [-0.0516, 1.05]	2.82*** [Pet]	2.12*** [Pet]	--
Metabolism	Biosynthesis_of_other_secondary_metabolites	Caffeine_metabolism	ko00232	1.92 (0.988)	1.45 (0.881)	1.4 (0.836)	0.0131	-0.474 [-0.933, -0.0145]*	-0.518 [-0.997, -0.0398]*	-0.0445 [-0.557, 0.468]	3.04*** [Pet]	--	3.59* [UIUC]
Metabolism	Biosynthesis_of_other_secondary_metabolites	Penicillin_and_cephalosporin_biosynthesis	ko00311	1.86 (0.877)	1.63 (1.03)	1.3 (0.869)	0.0203	-0.23 [-0.681, 0.221]	-0.561 [-1.03, -0.0918]*	-0.332 [-0.835, 0.172]	--	2.10* [UIUC]	--
Metabolism	Biosynthesis_of_other_secondary_metabolites	Phenazine_biosynthesis	ko00405	3.06 (0.907)	2.33 (1.09)	2.73 (0.971)	0.00165	-0.731 [-1.2, -0.259]**	-0.328 [-0.819, 0.164]	0.403 [-0.124, 0.93]	2.81*** [Pet]	--	2.88*** [UIUC]
Metabolism	Biosynthesis_of_other_secondary_metabolites	Phenylpropanoid_biosynthesis	ko00940	2.86 (1.15)	1.39 (0.971)	2.08 (1.53)	1.08e-08	-1.47 [-2.01, -0.935]***	-0.782 [-1.34, -0.222]**	0.691 [0.0908, 1.29]*	2.67*** [Pet]	2.23** [Pet]	--
Metabolism	Carbohydrate_metabolism	Ascorbate_and_aldarate_metabolism	ko00053	3.86 (0.886)	3.15 (0.923)	3.76 (0.661)	0.000306	-0.707 [-1.13, -0.286]***	-0.0926 [-0.531, 0.346]	0.614 [0.144, 1.08]**	3.19*** [Pet]	--	2.92** [UIUC]
Metabolism	Glycan_biosynthesis_and_metabolism	Glycosphingolipid_biosynthesis__ganglio_series	ko00604	2.14 (1.05)	2.72 (1.02)	2.65 (0.968)	0.00909	0.587 [0.0946, 1.08]*	0.51 [-0.00326, 1.02]	-0.0773 [-0.627, 0.473]	2.72*** [Kennel]	--	3.05* [Kennel]
Metabolism	Glycan_biosynthesis_and_metabolism	Lipopolysaccharide_biosynthesis	ko00540	3.85 (1.1)	2.94 (1.09)	3.33 (1.01)	0.000319	-0.905 [-1.43, -0.381]***	-0.515 [-1.06, 0.0311]	0.39 [-0.194, 0.975]	3.25*** [Pet]	--	--
Metabolism	Lipid_metabolism	Arachidonic_acid_metabolism	ko00590	2.33 (1.07)	1.52 (0.871)	1.74 (1.15)	0.000518	-0.811 [-1.32, -0.307]***	-0.594 [-1.12, -0.0683]*	0.217 [-0.346, 0.781]	2.69*** [Pet]	2.18** [Pet]	--
Metabolism	Lipid_metabolism	Ether_lipid_metabolism	ko00565	2.13 (1.19)	1.27 (1.05)	1.46 (1.34)	0.000903	-0.86 [-1.43, -0.294]**	-0.671 [-1.26, -0.0812]*	0.189 [-0.443, 0.821]	2.75*** [Pet]	2.28* [Pet]	--
Metabolism	Lipid_metabolism	Linoleic_acid_metabolism	ko00591	2.01 (1.27)	0.68 (0.846)	1.1 (1.21)	1.55e-07	-1.33 [-1.88, -0.785]***	-0.909 [-1.48, -0.338]***	0.424 [-0.188, 1.04]	2.91*** [Pet]	2.34** [Pet]	--
Metabolism	Lipid_metabolism	Primary_bile_acid_biosynthesis	ko00120	2.41 (0.956)	2.84 (1.07)	2.94 (0.893)	0.0253	0.431 [-0.0543, 0.916]	0.526 [0.0206, 1.03]*	0.0952 [-0.446, 0.637]	--	2.28** [UIUC]	--
Metabolism	Lipid_metabolism	Secondary_bile_acid_biosynthesis	ko00121	2.73 (0.983)	3.36 (0.936)	3.12 (0.956)	0.00653	0.63 [0.158, 1.1]**	0.391 [-0.101, 0.883]	-0.239 [-0.766, 0.288]	2.61*** [Kennel]	--	--
Metabolism	Metabolism_of_other_amino_acids	Phosphonate_and_phosphinate_metabolism	ko00440	3.52 (0.994)	2.79 (0.89)	2.91 (1)	0.000682	-0.732 [-1.21, -0.252]**	-0.608 [-1.11, -0.107]*	0.124 [-0.413, 0.661]	2.81*** [Pet]	2.45* [Pet]	--
Metabolism	Metabolism_of_terpenoids_and_polyketides	Biosynthesis_of_enediyne_antibiotics	ko01059	1.85 (1.01)	2.39 (0.953)	2.24 (0.899)	0.0236	0.537 [0.0578, 1.02]*	0.381 [-0.118, 0.88]	-0.156 [-0.691, 0.379]	2.98* [Kennel]	--	3.42* [Kennel]
Metabolism	Metabolism_of_terpenoids_and_polyketides	Biosynthesis_of_siderophore_group_nonribosomal_peptides	ko01053	3.04 (1.06)	2.17 (0.916)	2.86 (1.29)	0.000188	-0.877 [-1.37, -0.381]***	-0.188 [-0.705, 0.328]	0.689 [0.135, 1.24]*	2.96*** [Pet]	--	2.93** [UIUC]
Metabolism	Metabolism_of_terpenoids_and_polyketides	Geraniol_degradation	ko00281	2.88 (1.31)	1.69 (1.12)	2.61 (1.32)	2.24e-05	-1.19 [-1.78, -0.594]***	-0.266 [-0.886, 0.354]	0.923 [0.258, 1.59]**	2.84*** [Pet]	--	2.98** [UIUC]
Metabolism	Metabolism_of_terpenoids_and_polyketides	Nonribosomal_peptide_structures	ko01054	2.85 (0.874)	2.73 (0.911)	2.1 (0.911)	0.000484	-0.119 [-0.556, 0.319]	-0.749 [-1.2, -0.294]***	-0.631 [-1.12, -0.143]**	--	2.10* [Pet]	--
Metabolism	Xenobiotics_biodegradation_and_metabolism	Caprolactam_degradation	ko00930	3.18 (1.1)	2.69 (0.86)	3.33 (1.01)	0.013	-0.495 [-0.982, -0.00767]*	0.143 [-0.365, 0.65]	0.637 [0.0935, 1.18]*	2.78*** [Pet]	--	3.03*** [UIUC]
Metabolism	Xenobiotics_biodegradation_and_metabolism	Dioxin_degradation	ko00621	2.55 (1.03)	2.19 (1)	1.61 (1.21)	0.000196	-0.356 [-0.857, 0.146]	-0.943 [-1.47, -0.421]***	-0.588 [-1.15, -0.0276]*	--	2.17** [Pet]	--
Metabolism	Xenobiotics_biodegradation_and_metabolism	Styrene_degradation	ko00643	2.33 (1.06)	1.69 (1.02)	2.17 (0.991)	0.0111	-0.64 [-1.14, -0.135]**	-0.16 [-0.686, 0.366]	0.48 [-0.0836, 1.04]	2.81** [Pet]	--	3.40*** [UIUC]
