# Supplementary material for: Beagle dogs living in household or controlled environments show different gut microbiome profiles when fed an identical diet or diet type
Source: Research Square preprint supplement (doi:10.21203/rs.3.rs-3167499/v1), 2023-07-24
Supplement: Supplementary file 2 [file 943fc87d9574d26d71612c5e.xlsx]

## Sheet: Sheet1
Table 2. Results of generalized linear model testing the difference in taxonomic feature abundance by cohort controlling for diet type in discriminant taxonomic features identified by LEfSe among pairs of the three cohorts. (* = p-value < 0.05, ** = p-value < 0.01, *** = p-value < 0.001)
Taxa	Pet Mean (SD) n=54	Kennel Mean (SD) n=39	UIUC Mean (SD) n=34	pval_cohort_list	Tukey HSD Pairwise Cohort Differences [95% Confidence Interval]			Pairwise LEfSe Results (Linear Discriminant Analysis Score [Higher Abundant Group])
					Kennel-Pet	UIUC-Pet	UIUC-Kennel	Kennel-Pet	UIUC-Pet	UIUC-Kennel
k_bacteria.p__Actinobacteriota.c__.o__	2.27 (1.67)	2.88 (1.43)	3.21 (1.49)	0.0132	0.618 [-0.133, 1.37]	0.945 [0.162, 1.73]*	0.327 [-0.512, 1.17]	--	2.05*** [UIUC]	--
k_bacteria.p__Actinobacteriota.c__.o__.f__.g__	2.18 (1.45)	2.48 (1.17)	3.12 (1.34)	0.00589	0.298 [-0.358, 0.954]	0.94 [0.257, 1.62]**	0.642 [-0.0906, 1.37]	--	2.05*** [UIUC]	--
k_bacteria.p__Actinobacteriota.c__.o__.f__.g__.s__	1.9 (1.39)	2.37 (0.977)	2.97 (1.16)	0.000331	0.467 [-0.125, 1.06]	1.07 [0.458, 1.69]***	0.607 [-0.0536, 1.27]	--	2.05*** [UIUC]	--
k_bacteria.p__Actinobacteriota.c__Actinomycetia	4.33 (1.75)	5.14 (1.82)	5.81 (1.94)	0.00127	0.811 [-0.1, 1.72]	1.48 [0.527, 2.43]***	0.665 [-0.352, 1.68]	--	5.00*** [UIUC]	--
k_bacteria.p__Actinobacteriota.c__Actinomycetia.o__Actinomycetales	3.99 (1.76)	4.85 (1.47)	5.65 (1.89)	8.97e-05	0.857 [0.00737, 1.71]*	1.66 [0.771, 2.54]***	0.799 [-0.15, 1.75]	4.11*** [Kennel]	5.00*** [UIUC]	4.99** [UIUC]
k_bacteria.p__Actinobacteriota.c__Actinomycetia.o__Actinomycetales.f__Bifidobacteriaceae	3.41 (1.96)	4.76 (1.83)	5.55 (2.16)	2.74e-06	1.35 [0.406, 2.3]**	2.13 [1.15, 3.12]***	0.784 [-0.272, 1.84]	4.11*** [Kennel]	5.00*** [UIUC]	4.99** [UIUC]
k_bacteria.p__Actinobacteriota.c__Actinomycetia.o__Actinomycetales.f__Bifidobacteriaceae.g__Bifidobacterium	3.12 (1.68)	4.53 (1.88)	5.66 (1.86)	6.58e-10	1.41 [0.581, 2.24]***	2.54 [1.68, 3.4]***	1.13 [0.207, 2.06]*	4.11*** [Kennel]	5.00*** [UIUC]	4.99** [UIUC]
k_bacteria.p__Actinobacteriota.c__Actinomycetia.o__Actinomycetales.f__Bifidobacteriaceae.g__Bifidobacterium.s__	1.25 (1.6)	3.2 (1.64)	3.64 (1.84)	2.4e-11	1.95 [1.17, 2.73]***	2.39 [1.58, 3.2]***	0.439 [-0.433, 1.31]	2.35*** [Kennel]	3.33*** [UIUC]	3.33** [UIUC]
k_bacteria.p__Actinobacteriota.c__Actinomycetia.o__Actinomycetales.f__Bifidobacteriaceae.g__Bifidobacterium.s__Bifidobacterium_animalis	1.11 (1.59)	3.61 (1.71)	4.04 (2.12)	1.55e-14	2.5 [1.68, 3.33]***	2.94 [2.07, 3.8]***	0.434 [-0.491, 1.36]	3.28*** [Kennel]	4.25*** [UIUC]	4.25* [UIUC]
k_bacteria.p__Actinobacteriota.c__Actinomycetia.o__Actinomycetales.f__Bifidobacteriaceae.g__Bifidobacterium.s__Bifidobacterium_choerinum	0.428 (0.946)	2.4 (1.48)	2.97 (1.69)	2.1e-16	1.98 [1.34, 2.61]***	2.54 [1.87, 3.2]***	0.562 [-0.149, 1.27]	2.26*** [Kennel]	2.46*** [UIUC]	2.49** [UIUC]
k_bacteria.p__Actinobacteriota.c__Actinomycetia.o__Actinomycetales.f__Bifidobacteriaceae.g__Bifidobacterium.s__Bifidobacterium_cuniculi	0.379 (1.16)	1.77 (1.47)	2.63 (1.67)	7.88e-12	1.4 [0.731, 2.06]***	2.25 [1.56, 2.94]***	0.853 [0.111, 1.59]*	2.56*** [Pet]	2.40*** [UIUC]	2.58*** [UIUC]
k_bacteria.p__Actinobacteriota.c__Actinomycetia.o__Actinomycetales.f__Bifidobacteriaceae.g__Bifidobacterium.s__Bifidobacterium_gallinarum	0.776 (1.62)	2.62 (2)	2.18 (2.01)	1.34e-06	1.84 [0.998, 2.69]***	1.41 [0.529, 2.29]***	-0.434 [-1.38, 0.509]	2.70*** [Kennel]	2.71*** [UIUC]	--
k_bacteria.p__Actinobacteriota.c__Actinomycetia.o__Actinomycetales.f__Bifidobacteriaceae.g__Bifidobacterium.s__Bifidobacterium_globosum	2.03 (1.78)	4.36 (1.55)	4.8 (1.8)	1.12e-13	2.33 [1.52, 3.14]***	2.77 [1.93, 3.61]***	0.437 [-0.466, 1.34]	4.02*** [Kennel]	4.89*** [UIUC]	4.88** [UIUC]
k_bacteria.p__Actinobacteriota.c__Actinomycetia.o__Actinomycetales.f__Bifidobacteriaceae.g__Bifidobacterium.s__Bifidobacterium_longum	1.13 (1.6)	1.91 (1.46)	2.8 (1.39)	4.4e-06	0.779 [0.0505, 1.51]*	1.67 [0.907, 2.42]***	0.887 [0.0735, 1.7]*	2.42* [Pet]	2.36*** [UIUC]	2.61*** [UIUC]
k_bacteria.p__Actinobacteriota.c__Actinomycetia.o__Actinomycetales.f__Bifidobacteriaceae.g__Bifidobacterium.s__Bifidobacterium_mongoliense	0.457 (1.24)	1.64 (1.54)	1.8 (1.71)	2.32e-06	1.19 [0.533, 1.84]***	1.34 [0.659, 2.02]***	0.153 [-0.574, 0.881]	2.14*** [Pet]	2.21*** [UIUC]	--
k_bacteria.p__Actinobacteriota.c__Actinomycetia.o__Mycobacteriales.f__Mycobacteriaceae.g__Corynebacterium	2.59 (1.04)	2.96 (1.11)	3.26 (1.03)	0.0154	0.368 [-0.16, 0.897]	0.67 [0.12, 1.22]*	0.302 [-0.288, 0.892]	--	2.35*** [UIUC]	--
k_bacteria.p__Actinobacteriota.c__Actinomycetia.o__Mycobacteriales.f__Mycobacteriaceae.g__Corynebacterium.s__Corynebacterium_mustelae	2.21 (1.16)	2.59 (1.07)	2.91 (1.15)	0.0164	0.381 [-0.177, 0.939]	0.704 [0.122, 1.29]*	0.323 [-0.301, 0.946]	--	2.35*** [UIUC]	--
k_bacteria.p__Actinobacteriota.c__Coriobacteriia.o__Coriobacteriales.f__.g__	2.53 (1.57)	3.33 (1.45)	3.69 (1.38)	0.000962	0.796 [0.0701, 1.52]*	1.16 [0.4, 1.91]**	0.36 [-0.45, 1.17]	2.10** [Kennel]	2.27*** [UIUC]	--
k_bacteria.p__Actinobacteriota.c__Coriobacteriia.o__Coriobacteriales.f__.g__.s__	2.44 (1.58)	3.14 (1.18)	3.55 (1.26)	0.000956	0.699 [0.0158, 1.38]*	1.11 [0.398, 1.82]***	0.411 [-0.352, 1.17]	2.10** [Kennel]	2.27*** [UIUC]	--
k_bacteria.p__Actinobacteriota.c__Coriobacteriia.o__Coriobacteriales.f__Coriobacteriaceae.g__	1.95 (1.52)	2.65 (1.26)	2.43 (1.21)	0.0465	0.697 [0.0121, 1.38]*	0.48 [-0.234, 1.19]	-0.217 [-0.982, 0.548]	2.57* [Pet]	--	2.60* [Kennel]
k_bacteria.p__Actinobacteriota.c__Coriobacteriia.o__Coriobacteriales.f__Coriobacteriaceae.g__Collinsella.s__	3.61 (2.06)	4.72 (1.57)	4.22 (1.67)	0.0104	1.12 [0.248, 1.99]**	0.618 [-0.287, 1.52]	-0.499 [-1.47, 0.471]	3.24* [Kennel]	--	--
k_bacteria.p__Actinobacteriota.c__Coriobacteriia.o__Coriobacteriales.f__Coriobacteriaceae.g__Collinsella.s__Collinsella_intestinalis	4.86 (2.21)	5.89 (1.26)	5.15 (1.62)	0.0231	1.03 [0.145, 1.92]*	0.288 [-0.638, 1.21]	-0.745 [-1.74, 0.247]	--	--	4.31* [Kennel]
k_bacteria.p__Actinobacteriota.c__Coriobacteriia.o__Coriobacteriales.f__Coriobacteriaceae.g__Collinsella.s__Collinsella_phocaeensis	2.79 (1.81)	4.22 (1.48)	4.06 (1.47)	4.24e-05	1.44 [0.626, 2.24]***	1.27 [0.425, 2.11]**	-0.167 [-1.07, 0.736]	2.84*** [Kennel]	3.13*** [UIUC]	--
k_bacteria.p__Actinobacteriota.c__Coriobacteriia.o__Coriobacteriales.f__Coriobacteriaceae.g__Collinsella.s__Collinsella_provencensis	1.58 (1.34)	2.43 (1.24)	2.05 (1.09)	0.00685	0.845 [0.216, 1.47]**	0.473 [-0.182, 1.13]	-0.372 [-1.07, 0.33]	2.79** [Pet]	--	--
k_bacteria.p__Actinobacteriota.c__Coriobacteriia.o__Coriobacteriales.f__Coriobacteriaceae.g__Collinsella.s__Collinsella_tanakaei	2.38 (1.74)	3.08 (1.44)	3.17 (1.32)	0.0282	0.702 [-0.0583, 1.46]	0.783 [-0.00977, 1.58]	0.0803 [-0.769, 0.93]	--	--	--
k_bacteria.p__Actinobacteriota.c__Coriobacteriia.o__Coriobacteriales.f__Eggerthellaceae	3.93 (2.35)	4.77 (1.73)	5.01 (1.47)	0.028	0.84 [-0.147, 1.83]	1.07 [0.0438, 2.1]*	0.232 [-0.87, 1.33]	--	3.59*** [UIUC]	--
k_bacteria.p__Actinobacteriota.c__Coriobacteriia.o__Coriobacteriales.f__Eggerthellaceae.g__	2.66 (1.65)	3.86 (1.7)	3.89 (1.46)	0.000171	1.2 [0.42, 1.99]**	1.23 [0.418, 2.05]**	0.0305 [-0.844, 0.905]	2.94*** [Kennel]	3.07*** [UIUC]	--
k_bacteria.p__Actinobacteriota.c__Coriobacteriia.o__Coriobacteriales.f__Eggerthellaceae.g__.s__	2.8 (1.78)	3.73 (1.45)	3.49 (1.4)	0.0107	0.938 [0.174, 1.7]*	0.69 [-0.106, 1.49]	-0.248 [-1.1, 0.605]	2.94*** [Kennel]	--	--
k_bacteria.p__Actinobacteriota.c__Coriobacteriia.o__Coriobacteriales.f__Eggerthellaceae.g__Adlercreutzia	0.612 (1.05)	2.57 (2.16)	3.27 (2.41)	1.58e-10	1.95 [1.07, 2.84]***	2.66 [1.74, 3.57]***	0.702 [-0.281, 1.69]	2.96*** [Kennel]	3.45*** [UIUC]	--
k_bacteria.p__Actinobacteriota.c__Coriobacteriia.o__Coriobacteriales.f__Eggerthellaceae.g__Adlercreutzia.s__Adlercreutzia_equolifaciens	0.385 (0.982)	2.14 (1.95)	2.94 (2.32)	8.26e-11	1.75 [0.937, 2.57]***	2.56 [1.7, 3.41]***	0.801 [-0.112, 1.71]	2.96*** [Kennel]	3.45*** [UIUC]	--
k_bacteria.p__Actinobacteriota.c__Coriobacteriia.o__Coriobacteriales.f__Eggerthellaceae.g__DNF00809	0.889 (1.02)	2.29 (1.16)	2.47 (1.38)	3.7e-10	1.4 [0.83, 1.98]***	1.58 [0.985, 2.18]***	0.179 [-0.462, 0.82]	3.11*** [Kennel]	2.12*** [UIUC]	--
k_bacteria.p__Actinobacteriota.c__Coriobacteriia.o__Coriobacteriales.f__Eggerthellaceae.g__DNF00809.s__DNF00809_sp000814825	0.991 (1.17)	1.94 (1.07)	2.4 (1.43)	1.41e-06	0.946 [0.333, 1.56]**	1.41 [0.767, 2.04]***	0.46 [-0.224, 1.14]	3.11*** [Kennel]	2.12*** [UIUC]	--
k_bacteria.p__Actinobacteriota.c__Coriobacteriia.o__Coriobacteriales.f__Eggerthellaceae.g__Enteroscipio	0.472 (0.854)	1.94 (1.73)	2.3 (1.77)	7.68e-09	1.46 [0.769, 2.16]***	1.82 [1.1, 2.55]***	0.36 [-0.416, 1.14]	2.32*** [Kennel]	2.20*** [UIUC]	--
k_bacteria.p__Actinobacteriota.c__Coriobacteriia.o__Coriobacteriales.f__Eggerthellaceae.g__Enteroscipio.s__Enteroscipio_sp000270285	0.49 (0.918)	1.77 (1.52)	2.26 (1.7)	5.87e-09	1.28 [0.638, 1.93]***	1.77 [1.09, 2.44]***	0.481 [-0.241, 1.2]	2.32*** [Kennel]	2.20*** [UIUC]	--
k_bacteria.p__Actinobacteriota.c__Coriobacteriia.o__Coriobacteriales.f__Eggerthellaceae.g__Slackia_A	2.6 (2.32)	4.42 (1.84)	4.21 (1.49)	1.81e-05	1.82 [0.839, 2.8]***	1.61 [0.587, 2.63]***	-0.211 [-1.31, 0.887]	3.10*** [Kennel]	2.87** [UIUC]	--
k_bacteria.p__Actinobacteriota.c__Coriobacteriia.o__Coriobacteriales.f__Eggerthellaceae.g__Slackia_A.s__	2.14 (2.08)	4.06 (1.62)	3.94 (1.52)	4.35e-07	1.92 [1.02, 2.83]***	1.8 [0.861, 2.74]***	-0.123 [-1.13, 0.884]	3.09*** [Kennel]	2.97*** [UIUC]	--
k_bacteria.p__Actinobacteriota.c__Coriobacteriia.o__Coriobacteriales.f__Eggerthellaceae.g__Slackia_A.s__Slackia_A_piriformis	2.06 (2.01)	3.47 (1.62)	2.36 (1.43)	0.000747	1.4 [0.531, 2.27]***	0.291 [-0.617, 1.2]	-1.11 [-2.08, -0.138]*	2.68** [Pet]	--	2.58** [Kennel]
k_bacteria.p__Actinobacteriota.c__Coriobacteriia.o__Coriobacteriales.f__Eggerthellaceae.g__Slackia_A.s__Slackia_A_sp900553775	1.29 (1.55)	2.69 (1.22)	1.76 (1.32)	3.08e-05	1.4 [0.698, 2.1]***	0.466 [-0.262, 1.19]	-0.931 [-1.71, -0.15]*	2.43*** [Pet]	--	2.84** [Kennel]
k_bacteria.p__Bacteroidota	5.43 (1.71)	5.5 (1.29)	4.5 (1.66)	0.01	0.0736 [-0.7, 0.847]	-0.928 [-1.73, -0.122]*	-1 [-1.86, -0.138]*	--	4.49** [Pet]	--
k_bacteria.p__Bacteroidota.c__Bacteroidia	5.99 (1.79)	6.08 (1.53)	4.94 (1.84)	0.00463	0.0939 [-0.717, 0.905]	-1.05 [-1.9, -0.205]*	-1.14 [-2.05, -0.238]**	--	4.49** [Pet]	--
k_bacteria.p__Bacteroidota.c__Bacteroidia.o__Bacteroidales	5.9 (1.77)	5.98 (1.41)	4.98 (1.59)	0.0134	0.0802 [-0.71, 0.87]	-0.913 [-1.74, -0.0897]*	-0.993 [-1.88, -0.111]*	--	4.49** [Pet]	--
k_bacteria.p__Bacteroidota.c__Bacteroidia.o__Bacteroidales.f__.g__	3.74 (1.5)	3.95 (1.5)	3.02 (1.37)	0.0197	0.208 [-0.516, 0.933]	-0.718 [-1.47, 0.0369]	-0.926 [-1.74, -0.117]*	--	--	--
k_bacteria.p__Bacteroidota.c__Bacteroidia.o__Bacteroidales.f__.g__.s__	3.66 (1.43)	3.98 (1.35)	2.74 (1.33)	0.000436	0.318 [-0.354, 0.99]	-0.922 [-1.62, -0.221]**	-1.24 [-1.99, -0.489]***	--	2.67* [Pet]	--
k_bacteria.p__Bacteroidota.c__Bacteroidia.o__Bacteroidales.f__Bacteroidaceae	5.86 (1.56)	6.01 (1.46)	4.87 (1.61)	0.00236	0.149 [-0.589, 0.887]	-0.985 [-1.75, -0.217]**	-1.13 [-1.96, -0.311]**	--	4.48** [Pet]	--
k_bacteria.p__Bacteroidota.c__Bacteroidia.o__Bacteroidales.f__Bacteroidaceae.g__	3.81 (1.43)	4.14 (1.3)	3.05 (1.36)	0.00211	0.329 [-0.329, 0.987]	-0.761 [-1.45, -0.076]*	-1.09 [-1.82, -0.356]**	--	2.69** [Pet]	--
k_bacteria.p__Bacteroidota.c__Bacteroidia.o__Bacteroidales.f__Bacteroidaceae.g__.s__	3.74 (1.23)	4.18 (1.23)	2.76 (1.49)	3.9e-06	0.434 [-0.15, 1.02]	-0.981 [-1.59, -0.372]***	-1.41 [-2.07, -0.763]***	--	2.69** [Pet]	--
k_bacteria.p__Bacteroidota.c__Bacteroidia.o__Bacteroidales.f__Bacteroidaceae.g__Bacteroides	5.11 (1.87)	4.89 (1.15)	4.03 (1.39)	0.00549	-0.224 [-0.988, 0.54]	-1.08 [-1.88, -0.287]**	-0.859 [-1.71, -0.00653]*	--	4.47** [Pet]	--
k_bacteria.p__Bacteroidota.c__Bacteroidia.o__Bacteroidales.f__Bacteroidaceae.g__Bacteroides.s__	4.19 (1.83)	4.03 (1.51)	3.04 (1.45)	0.00332	-0.157 [-0.941, 0.626]	-1.15 [-1.96, -0.329]**	-0.988 [-1.86, -0.113]*	--	3.69** [Pet]	--
k_bacteria.p__Bacteroidota.c__Bacteroidia.o__Bacteroidales.f__Bacteroidaceae.g__Bacteroides.s__Bacteroides_caecimuris	1.86 (1.84)	1.67 (1.19)	0.738 (1.07)	0.00229	-0.194 [-0.932, 0.544]	-1.13 [-1.89, -0.357]**	-0.932 [-1.76, -0.108]*	--	2.10* [Pet]	--
k_bacteria.p__Bacteroidota.c__Bacteroidia.o__Bacteroidales.f__Bacteroidaceae.g__Bacteroides.s__Bacteroides_faecis	2.22 (1.52)	2.43 (1.15)	1.53 (1.33)	0.0129	0.214 [-0.451, 0.88]	-0.687 [-1.38, 0.00641]	-0.901 [-1.64, -0.158]*	--	--	--
k_bacteria.p__Bacteroidota.c__Bacteroidia.o__Bacteroidales.f__Bacteroidaceae.g__Bacteroides.s__Bacteroides_finegoldii	2.49 (1.5)	3.22 (1.26)	2.01 (1.61)	0.000596	0.735 [0.075, 1.39]*	-0.479 [-1.17, 0.208]	-1.21 [-1.95, -0.477]***	2.27*** [Kennel]	--	2.33*** [Kennel]
k_bacteria.p__Bacteroidota.c__Bacteroidia.o__Bacteroidales.f__Bacteroidaceae.g__Bacteroides.s__Bacteroides_fluxus	1.27 (1.3)	1.86 (1.04)	2.11 (1.53)	0.00451	0.584 [-0.0185, 1.19]	0.839 [0.211, 1.47]**	0.255 [-0.418, 0.928]	--	2.14** [UIUC]	--
k_bacteria.p__Bacteroidota.c__Bacteroidia.o__Bacteroidales.f__Bacteroidaceae.g__Bacteroides.s__Bacteroides_fragilis	2.81 (1.58)	2.57 (1.37)	1.14 (1.19)	1.7e-07	-0.243 [-0.904, 0.417]	-1.67 [-2.35, -0.979]***	-1.42 [-2.16, -0.686]***	--	3.46*** [Pet]	--
k_bacteria.p__Bacteroidota.c__Bacteroidia.o__Bacteroidales.f__Bacteroidaceae.g__Bacteroides.s__Bacteroides_fragilis_A	1.99 (1.58)	1.38 (1.11)	0.423 (0.831)	8.21e-07	-0.615 [-1.25, 0.0209]	-1.57 [-2.23, -0.905]***	-0.952 [-1.66, -0.243]**	--	2.04*** [Pet]	--
k_bacteria.p__Bacteroidota.c__Bacteroidia.o__Bacteroidales.f__Bacteroidaceae.g__Bacteroides.s__Bacteroides_ovatus	3.16 (1.87)	2.65 (1.3)	1.59 (1.31)	3.13e-05	-0.512 [-1.26, 0.24]	-1.57 [-2.35, -0.784]***	-1.06 [-1.9, -0.216]**	--	3.93*** [Pet]	--
k_bacteria.p__Bacteroidota.c__Bacteroidia.o__Bacteroidales.f__Bacteroidaceae.g__Bacteroides.s__Bacteroides_sp900066265	1.92 (1.59)	2.04 (1.38)	1.05 (1.13)	0.00309	0.123 [-0.541, 0.786]	-0.87 [-1.56, -0.179]**	-0.993 [-1.73, -0.252]**	--	2.06* [Pet]	--
k_bacteria.p__Bacteroidota.c__Bacteroidia.o__Bacteroidales.f__Bacteroidaceae.g__Bacteroides.s__Bacteroides_thetaiotaomicron	3.46 (1.98)	2.47 (1.23)	1.65 (1.15)	2.17e-06	-0.992 [-1.77, -0.214]**	-1.81 [-2.62, -1]***	-0.82 [-1.69, 0.0484]	3.73** [Pet]	3.75*** [Pet]	--
k_bacteria.p__Bacteroidota.c__Bacteroidia.o__Bacteroidales.f__Bacteroidaceae.g__Bacteroides.s__Bacteroides_xylanisolvens	2.61 (2.14)	1.59 (1.23)	0.881 (1.15)	1.19e-05	-1.03 [-1.84, -0.216]**	-1.73 [-2.58, -0.887]***	-0.705 [-1.61, 0.202]	--	3.38*** [Pet]	2.76** [Kennel]
k_bacteria.p__Bacteroidota.c__Bacteroidia.o__Bacteroidales.f__Bacteroidaceae.g__Phocaeicola	4.91 (1.71)	5.6 (1.57)	4.41 (1.72)	0.00691	0.696 [-0.1, 1.49]	-0.497 [-1.33, 0.333]	-1.19 [-2.08, -0.304]**	--	--	--
k_bacteria.p__Bacteroidota.c__Bacteroidia.o__Bacteroidales.f__Bacteroidaceae.g__Phocaeicola.s__Phocaeicola_coprocola	2.46 (1.76)	3.77 (1.37)	2.85 (1.86)	0.000375	1.31 [0.544, 2.07]***	0.385 [-0.407, 1.18]	-0.92 [-1.77, -0.0704]*	3.16*** [Kennel]	--	3.04*** [Kennel]
k_bacteria.p__Bacteroidota.c__Bacteroidia.o__Bacteroidales.f__Bacteroidaceae.g__Phocaeicola.s__Phocaeicola_coprophilus	1.53 (1.33)	3.07 (1.31)	2.04 (1.69)	2.93e-08	1.53 [0.958, 2.11]***	0.512 [-0.0887, 1.11]	-1.02 [-1.67, -0.378]***	2.47*** [Kennel]	--	2.29*** [Kennel]
k_bacteria.p__Bacteroidota.c__Bacteroidia.o__Bacteroidales.f__Bacteroidaceae.g__Phocaeicola.s__Phocaeicola_plebeius	3.1 (1.25)	4.11 (1.56)	2.6 (1.65)	5.53e-06	1 [0.364, 1.65]***	-0.506 [-1.17, 0.162]	-1.51 [-2.23, -0.795]***	3.03*** [Kennel]	--	2.95*** [Kennel]
k_bacteria.p__Bacteroidota.c__Bacteroidia.o__Bacteroidales.f__Bacteroidaceae.g__Phocaeicola.s__Phocaeicola_sp900542985	2.11 (1.21)	3.04 (1.24)	1.58 (1.32)	1.59e-06	0.929 [0.349, 1.51]***	-0.526 [-1.13, 0.0786]	-1.45 [-2.1, -0.807]***	2.60*** [Kennel]	--	2.37*** [Kennel]
k_bacteria.p__Bacteroidota.c__Bacteroidia.o__Bacteroidales.f__Bacteroidaceae.g__Phocaeicola.s__Phocaeicola_sp900546645	3.31 (1.81)	4.94 (1.56)	3.38 (1.81)	3.85e-06	1.63 [0.841, 2.42]***	0.0777 [-0.744, 0.9]	-1.55 [-2.43, -0.671]***	4.03*** [Kennel]	--	3.92*** [Kennel]
k_bacteria.p__Bacteroidota.c__Bacteroidia.o__Bacteroidales.f__Bacteroidaceae.g__Phocaeicola.s__Phocaeicola_sp900556845	2.43 (1.58)	3.65 (1.58)	2.14 (1.66)	3.65e-05	1.22 [0.475, 1.97]***	-0.289 [-1.06, 0.487]	-1.51 [-2.34, -0.677]***	2.81*** [Kennel]	--	2.78*** [Kennel]
k_bacteria.p__Bacteroidota.c__Bacteroidia.o__Bacteroidales.f__Bacteroidaceae.g__Prevotella	2.1 (1.66)	4.12 (2.25)	2.44 (2.02)	1.56e-08	2.03 [1.26, 2.8]***	0.343 [-0.459, 1.14]	-1.69 [-2.55, -0.827]***	4.09*** [Kennel]	--	4.00** [Kennel]
k_bacteria.p__Bacteroidota.c__Bacteroidia.o__Bacteroidales.f__Bacteroidaceae.g__Prevotella.s__	1.14 (1.27)	2.06 (1.63)	1.21 (1.34)	0.000289	0.918 [0.364, 1.47]***	0.071 [-0.506, 0.648]	-0.847 [-1.47, -0.228]**	2.34*** [Kennel]	--	2.32* [Kennel]
k_bacteria.p__Bacteroidota.c__Bacteroidia.o__Bacteroidales.f__Bacteroidaceae.g__Prevotella.s__Prevotella_copri	1.06 (1.72)	3.37 (2.47)	2.18 (2.11)	9.91e-10	2.31 [1.53, 3.09]***	1.12 [0.306, 1.94]**	-1.19 [-2.06, -0.318]**	4.09*** [Kennel]	3.11** [UIUC]	3.99* [Kennel]
k_bacteria.p__Bacteroidota.c__Bacteroidia.o__Bacteroidales.f__Bacteroidaceae.g__Prevotella.s__Prevotella_sp900290275	0.985 (1.22)	2.41 (1.53)	1.07 (1.08)	2.97e-09	1.42 [0.892, 1.95]***	0.0812 [-0.471, 0.633]	-1.34 [-1.93, -0.749]***	2.32*** [Kennel]	--	2.27** [Kennel]
k_bacteria.p__Bacteroidota.c__Bacteroidia.o__Bacteroidales.f__Tannerellaceae.g__Parabacteroides	3.27 (1.5)	3.64 (1.53)	2.49 (1.43)	0.00414	0.375 [-0.356, 1.11]	-0.772 [-1.53, -0.0103]*	-1.15 [-1.96, -0.331]**	--	--	--
k_bacteria.p__Bacteroidota.c__Bacteroidia.o__Bacteroidales.f__Tannerellaceae.g__Parabacteroides.s__	1.93 (1.4)	1.55 (1.19)	1.17 (1.25)	0.0272	-0.381 [-1.02, 0.256]	-0.755 [-1.42, -0.0916]*	-0.374 [-1.09, 0.337]	--	2.07* [Pet]	--
k_bacteria.p__Firmicutes_A.c__	2.04 (1.64)	3.28 (1.6)	2.88 (1.6)	0.00114	1.24 [0.435, 2.05]**	0.842 [0.00173, 1.68]*	-0.4 [-1.3, 0.5]	2.78*** [Kennel]	2.36*** [UIUC]	2.39* [Kennel]
k_bacteria.p__Firmicutes_A.c__.o__	1.99 (1.38)	3.12 (1.31)	2.76 (1.31)	0.000299	1.13 [0.463, 1.8]***	0.77 [0.0745, 1.46]*	-0.36 [-1.11, 0.384]	2.78*** [Kennel]	2.36*** [UIUC]	2.39* [Kennel]
k_bacteria.p__Firmicutes_A.c__.o__.f__	2.06 (1.52)	3.27 (1.37)	2.79 (1.32)	0.000354	1.21 [0.501, 1.92]***	0.73 [-0.00987, 1.47]	-0.481 [-1.27, 0.312]	2.78*** [Kennel]	--	2.39* [Kennel]
k_bacteria.p__Firmicutes_A.c__.o__.f__.g__	1.86 (1.32)	3.15 (1.12)	2.39 (1.13)	8.74e-06	1.3 [0.689, 1.9]***	0.535 [-0.0974, 1.17]	-0.762 [-1.44, -0.0838]*	2.78*** [Kennel]	--	2.39* [Kennel]
k_bacteria.p__Firmicutes_A.c__.o__.f__.g__.s__	1.58 (1.1)	2.95 (1.08)	2.48 (1.14)	7.63e-08	1.37 [0.822, 1.91]***	0.902 [0.334, 1.47]***	-0.466 [-1.07, 0.143]	2.78*** [Kennel]	2.36*** [UIUC]	2.39* [Kennel]
k_bacteria.p__Firmicutes_A.c__Clostridia.o__.f__.g__	4.18 (1.2)	4.73 (0.868)	4.05 (1)	0.0109	0.551 [0.0332, 1.07]*	-0.129 [-0.669, 0.41]	-0.681 [-1.26, -0.102]*	2.61*** [Kennel]	--	2.56** [Kennel]
k_bacteria.p__Firmicutes_A.c__Clostridia.o__.f__.g__.s__	4 (0.945)	4.51 (0.943)	3.96 (1.03)	0.0183	0.515 [0.0359, 0.993]*	-0.04 [-0.539, 0.459]	-0.555 [-1.09, -0.0201]*	2.61*** [Kennel]	--	2.56** [Kennel]
k_bacteria.p__Firmicutes_A.c__Clostridia.o__Clostridiales.f__Clostridiaceae.g__	1.75 (1.4)	3.34 (0.878)	2.85 (0.975)	3.74e-09	1.59 [1.01, 2.17]***	1.1 [0.5, 1.71]***	-0.484 [-1.13, 0.164]	2.40*** [Kennel]	2.13*** [UIUC]	--
k_bacteria.p__Firmicutes_A.c__Clostridia.o__Clostridiales.f__Clostridiaceae.g__.s__	1.59 (1.3)	3.38 (1.08)	2.82 (1.21)	3.17e-10	1.79 [1.18, 2.39]***	1.23 [0.597, 1.86]***	-0.557 [-1.23, 0.121]	2.40*** [Kennel]	2.13*** [UIUC]	--
k_bacteria.p__Firmicutes_A.c__Clostridia.o__Clostridiales.f__Clostridiaceae.g__Clostridium_P	3.81 (1.38)	4.47 (1.32)	3.81 (1.5)	0.0395	0.655 [-0.00283, 1.31]	0.0032 [-0.682, 0.688]	-0.652 [-1.39, 0.0827]	--	--	--
k_bacteria.p__Firmicutes_A.c__Clostridia.o__Clostridiales.f__Clostridiaceae.g__Clostridium_P.s__	2.94 (1.3)	3.73 (0.986)	2.9 (0.856)	0.00107	0.793 [0.242, 1.34]**	-0.0381 [-0.612, 0.536]	-0.831 [-1.45, -0.216]**	2.42*** [Pet]	--	2.34*** [Kennel]
k_bacteria.p__Firmicutes_A.c__Clostridia.o__Clostridiales.f__Clostridiaceae.g__Clostridium_P.s__Clostridium_P_perfringens	2.62 (1.79)	3.96 (1.69)	2.96 (1.66)	0.000164	1.35 [0.597, 2.09]***	0.342 [-0.438, 1.12]	-1 [-1.84, -0.169]*	4.07*** [Kennel]	--	--
k_bacteria.p__Firmicutes_A.c__Clostridia.o__Clostridiales.f__Clostridiaceae.g__Clostridium.s__	1.99 (1.33)	2.7 (1.29)	2.68 (1.13)	0.00973	0.714 [0.0825, 1.35]*	0.696 [0.0373, 1.35]*	-0.0188 [-0.724, 0.687]	2.19*** [Kennel]	2.22*** [UIUC]	--
k_bacteria.p__Firmicutes_A.c__Clostridia.o__Clostridiales.f__Clostridiaceae.g__Clostridium.s__Clostridium_celatum	1.25 (1.33)	2.74 (1.19)	2.68 (1.31)	2.21e-08	1.49 [0.857, 2.13]***	1.43 [0.769, 2.09]***	-0.0617 [-0.772, 0.649]	2.15*** [Kennel]	2.17*** [UIUC]	--
k_bacteria.p__Firmicutes_A.c__Clostridia.o__Clostridiales.f__Clostridiaceae.g__Clostridium.s__Clostridium_disporicum_A	1.04 (1.39)	2.73 (1.24)	2.72 (1.28)	6.06e-10	1.69 [1.03, 2.35]***	1.68 [0.998, 2.37]***	-0.00692 [-0.74, 0.726]	2.36*** [Kennel]	2.19*** [UIUC]	--
k_bacteria.p__Firmicutes_A.c__Clostridia.o__Clostridiales.f__Clostridiaceae.g__Clostridium.s__Clostridium_neonatale	2.23 (1.94)	0.423 (0.715)	1.05 (0.989)	5.13e-08	-1.8 [-2.51, -1.1]***	-1.18 [-1.92, -0.443]***	0.623 [-0.169, 1.41]	2.59*** [Pet]	2.39** [Pet]	3.73* [Kennel]
k_bacteria.p__Firmicutes_A.c__Clostridia.o__Clostridiales.f__Clostridiaceae.g__Clostridium.s__Clostridium_saudiense	1.85 (1.73)	3.79 (1.11)	3.53 (1.38)	1.58e-09	1.94 [1.2, 2.67]***	1.68 [0.918, 2.44]***	-0.256 [-1.07, 0.561]	2.98*** [Kennel]	2.82*** [UIUC]	--
k_bacteria.p__Firmicutes_A.c__Clostridia.o__Clostridiales.f__Clostridiaceae.g__Clostridium.s__Clostridium_sp000753455	1.32 (1.5)	2.61 (1.55)	3.35 (1.49)	5.09e-10	1.29 [0.622, 1.96]***	2.03 [1.33, 2.73]***	0.737 [-0.0124, 1.49]	2.73*** [Kennel]	2.71*** [UIUC]	2.52** [Kennel]
k_bacteria.p__Firmicutes_A.c__Clostridia.o__Lachnospirales.f__Cellulosilyticaceae	3.01 (1.8)	3.56 (1.86)	3.86 (1.34)	0.0421	0.556 [-0.238, 1.35]	0.851 [0.0232, 1.68]*	0.294 [-0.593, 1.18]	--	3.36*** [UIUC]	--
k_bacteria.p__Firmicutes_A.c__Clostridia.o__Lachnospirales.f__Cellulosilyticaceae.g__Niameybacter	2.07 (1.85)	2.58 (1.66)	3.35 (1.67)	0.00127	0.505 [-0.269, 1.28]	1.28 [0.469, 2.08]***	0.77 [-0.0937, 1.63]	--	3.40*** [UIUC]	--
k_bacteria.p__Firmicutes_A.c__Clostridia.o__Lachnospirales.f__Lachnospiraceae	6.42 (1.34)	6.91 (1.3)	6.17 (1.16)	0.0408	0.492 [-0.143, 1.13]	-0.25 [-0.912, 0.412]	-0.742 [-1.45, -0.0326]*	--	--	--
k_bacteria.p__Firmicutes_A.c__Clostridia.o__Lachnospirales.f__Lachnospiraceae.g__.s__	4.82 (1.28)	5.36 (0.967)	4.65 (0.98)	0.0147	0.544 [-0.00676, 1.1]	-0.171 [-0.745, 0.403]	-0.715 [-1.33, -0.0997]*	--	--	--
k_bacteria.p__Firmicutes_A.c__Clostridia.o__Lachnospirales.f__Lachnospiraceae.g__Anaerosporobacter	1.65 (1.87)	0.645 (0.983)	0.0608 (0.355)	1.37e-06	-1 [-1.68, -0.319]**	-1.59 [-2.29, -0.875]***	-0.584 [-1.35, 0.176]	2.58* [Pet]	2.14*** [Pet]	4.01*** [Kennel]
k_bacteria.p__Firmicutes_A.c__Clostridia.o__Lachnospirales.f__Lachnospiraceae.g__Anaerosporobacter.s__Anaerosporobacter_mobilis	1.49 (1.75)	0.714 (0.973)	0.0546 (0.319)	6.08e-06	-0.776 [-1.42, -0.132]*	-1.44 [-2.11, -0.765]***	-0.66 [-1.38, 0.0592]	2.58* [Pet]	2.14*** [Pet]	3.98*** [Kennel]
k_bacteria.p__Firmicutes_A.c__Clostridia.o__Lachnospirales.f__Lachnospiraceae.g__Anaerostipes	3.7 (1.53)	2.94 (0.875)	2.64 (0.998)	0.000243	-0.758 [-1.37, -0.149]*	-1.06 [-1.69, -0.423]***	-0.3 [-0.981, 0.38]	--	2.54*** [Pet]	3.13*** [Kennel]
k_bacteria.p__Firmicutes_A.c__Clostridia.o__Lachnospirales.f__Lachnospiraceae.g__Anaerostipes.s__Anaerostipes_caccae	3.01 (1.58)	2.34 (0.973)	2.03 (1.06)	0.00151	-0.678 [-1.32, -0.0375]*	-0.984 [-1.65, -0.318]**	-0.307 [-1.02, 0.408]	--	2.54*** [Pet]	3.13*** [Kennel]
k_bacteria.p__Firmicutes_A.c__Clostridia.o__Lachnospirales.f__Lachnospiraceae.g__Blautia_A	5.04 (1.69)	5.95 (0.966)	5.54 (1.26)	0.00761	0.909 [0.226, 1.59]**	0.495 [-0.216, 1.21]	-0.414 [-1.18, 0.348]	4.71*** [Kennel]	--	4.56*** [Kennel]
k_bacteria.p__Firmicutes_A.c__Clostridia.o__Lachnospirales.f__Lachnospiraceae.g__Blautia_A.s__	3.74 (1.59)	5.52 (1.29)	4.8 (1.35)	8.51e-08	1.78 [1.08, 2.48]***	1.06 [0.329, 1.79]**	-0.719 [-1.5, 0.0653]	4.47*** [Kennel]	3.48** [UIUC]	4.38*** [Kennel]
k_bacteria.p__Firmicutes_A.c__Clostridia.o__Lachnospirales.f__Lachnospiraceae.g__Blautia_A.s__Blautia_A_massiliensis	3 (0.903)	4.02 (0.861)	3.13 (1.02)	1.46e-06	1.02 [0.558, 1.48]***	0.125 [-0.356, 0.607]	-0.894 [-1.41, -0.379]***	2.55*** [Kennel]	--	2.45*** [Kennel]
k_bacteria.p__Firmicutes_A.c__Clostridia.o__Lachnospirales.f__Lachnospiraceae.g__Blautia_A.s__Blautia_A_sp000433815	3.59 (1.86)	4.77 (1.01)	3.92 (1.48)	0.00115	1.19 [0.435, 1.94]***	0.337 [-0.445, 1.12]	-0.849 [-1.69, -0.01]*	3.27** [Pet]	--	--
k_bacteria.p__Firmicutes_A.c__Clostridia.o__Lachnospirales.f__Lachnospiraceae.g__Blautia_A.s__Blautia_A_sp900541345	4.1 (1.74)	5.76 (1.31)	4.64 (1.35)	2.41e-06	1.67 [0.928, 2.41]***	0.543 [-0.229, 1.32]	-1.13 [-1.95, -0.298]**	4.38*** [Kennel]	--	4.08** [Kennel]
k_bacteria.p__Firmicutes_A.c__Clostridia.o__Lachnospirales.f__Lachnospiraceae.g__Blautia_A.s__Blautia_A_wexlerae	3.46 (1.31)	3.57 (1.16)	2.63 (1.18)	0.00212	0.112 [-0.496, 0.721]	-0.827 [-1.46, -0.193]**	-0.939 [-1.62, -0.26]**	--	--	--
k_bacteria.p__Firmicutes_A.c__Clostridia.o__Lachnospirales.f__Lachnospiraceae.g__Blautia.s__Blautia_hansenii	4.94 (1.25)	5.51 (1.04)	4.84 (1.34)	0.027	0.57 [-0.0133, 1.15]	-0.0979 [-0.706, 0.51]	-0.668 [-1.32, -0.0166]*	--	--	--
k_bacteria.p__Firmicutes_A.c__Clostridia.o__Lachnospirales.f__Lachnospiraceae.g__Blautia.s__Blautia_sp001304935	3.03 (0.907)	3.68 (0.881)	3.58 (0.907)	0.00133	0.651 [0.198, 1.1]**	0.552 [0.0807, 1.02]*	-0.0983 [-0.604, 0.407]	2.47*** [Kennel]	--	2.24*** [Kennel]
k_bacteria.p__Firmicutes_A.c__Clostridia.o__Lachnospirales.f__Lachnospiraceae.g__Blautia.s__Blautia_sp003287895	2.76 (1.36)	3.52 (0.871)	2.9 (1.39)	0.00681	0.76 [0.185, 1.34]**	0.144 [-0.456, 0.743]	-0.617 [-1.26, 0.0258]	2.55** [Pet]	--	--
k_bacteria.p__Firmicutes_A.c__Clostridia.o__Lachnospirales.f__Lachnospiraceae.g__Blautia.s__Blautia_sp900120295	2.97 (1.11)	3.97 (1.06)	2.95 (1.53)	1.47e-05	1.01 [0.477, 1.54]***	-0.0124 [-0.566, 0.541]	-1.02 [-1.61, -0.427]***	2.39*** [Kennel]	--	2.43** [Kennel]
k_bacteria.p__Firmicutes_A.c__Clostridia.o__Lachnospirales.f__Lachnospiraceae.g__Clostridium_Q.s__Clostridium_Q_sp000435655	2.2 (1.42)	2.68 (1.46)	1.49 (1.11)	0.000652	0.484 [-0.158, 1.13]	-0.706 [-1.38, -0.0369]*	-1.19 [-1.91, -0.473]***	--	--	--
k_bacteria.p__Firmicutes_A.c__Clostridia.o__Lachnospirales.f__Lachnospiraceae.g__Dorea.s__Dorea_formicigenerans	2.41 (1.12)	3 (1.02)	1.79 (1.07)	2.35e-05	0.587 [0.0542, 1.12]*	-0.623 [-1.18, -0.068]*	-1.21 [-1.81, -0.615]***	2.73*** [Kennel]	--	2.68*** [Kennel]
k_bacteria.p__Firmicutes_A.c__Clostridia.o__Lachnospirales.f__Lachnospiraceae.g__Dorea.s__Dorea_longicatena	2.17 (1.46)	3.06 (0.922)	2.29 (1)	0.00155	0.891 [0.295, 1.49]**	0.125 [-0.497, 0.746]	-0.766 [-1.43, -0.101]*	2.97*** [Kennel]	--	2.97*** [Kennel]
k_bacteria.p__Firmicutes_A.c__Clostridia.o__Lachnospirales.f__Lachnospiraceae.g__Dorea.s__Dorea_sp900240315	2.44 (1.38)	3.71 (1.2)	2.87 (1.02)	1.42e-05	1.27 [0.661, 1.88]***	0.437 [-0.2, 1.07]	-0.835 [-1.52, -0.152]*	2.53*** [Kennel]	--	2.48*** [Kennel]
k_bacteria.p__Firmicutes_A.c__Clostridia.o__Lachnospirales.f__Lachnospiraceae.g__Eisenbergiella	3.22 (1.66)	4.25 (1.26)	3.88 (1.25)	0.00257	1.03 [0.321, 1.74]**	0.663 [-0.0765, 1.4]	-0.368 [-1.16, 0.425]	3.28*** [Kennel]	--	3.13* [Kennel]
k_bacteria.p__Firmicutes_A.c__Clostridia.o__Lachnospirales.f__Lachnospiraceae.g__Eisenbergiella.s__Eisenbergiella_sp900539715	2.52 (2.01)	4.25 (1.2)	3.57 (1.6)	7.31e-06	1.74 [0.914, 2.56]***	1.05 [0.196, 1.91]*	-0.684 [-1.6, 0.232]	3.28*** [Kennel]	2.63** [UIUC]	3.13* [Kennel]
k_bacteria.p__Firmicutes_A.c__Clostridia.o__Lachnospirales.f__Lachnospiraceae.g__Eubacterium_I	2.53 (1.44)	2.29 (1.06)	1.81 (1.1)	0.0294	-0.248 [-0.858, 0.361]	-0.72 [-1.36, -0.0854]*	-0.472 [-1.15, 0.209]	--	--	--
k_bacteria.p__Firmicutes_A.c__Clostridia.o__Lachnospirales.f__Lachnospiraceae.g__Eubacterium_I.s__Eubacterium_I_ramulus	2.29 (1.31)	2.52 (1)	1.63 (1.16)	0.00409	0.227 [-0.353, 0.807]	-0.665 [-1.27, -0.0611]*	-0.892 [-1.54, -0.245]**	--	--	--
k_bacteria.p__Firmicutes_A.c__Clostridia.o__Lachnospirales.f__Lachnospiraceae.g__Faecalimonas.s__	3.28 (1.2)	3.99 (1.12)	3.27 (1)	0.00476	0.709 [0.157, 1.26]**	-0.00815 [-0.583, 0.567]	-0.717 [-1.33, -0.101]*	2.17* [Kennel]	--	--
k_bacteria.p__Firmicutes_A.c__Clostridia.o__Lachnospirales.f__Lachnospiraceae.g__Faecalimonas.s__Faecalimonas_nexilis	3.17 (1.16)	3.66 (1.07)	2.78 (1.12)	0.00416	0.49 [-0.0688, 1.05]	-0.395 [-0.977, 0.187]	-0.885 [-1.51, -0.261]**	--	--	--
k_bacteria.p__Firmicutes_A.c__Clostridia.o__Lachnospirales.f__Lachnospiraceae.g__Faecalimonas.s__Faecalimonas_sp000209385	2.36 (1.32)	3.33 (1.09)	1.99 (1.34)	2.28e-05	0.965 [0.346, 1.58]***	-0.37 [-1.02, 0.275]	-1.34 [-2.03, -0.644]***	2.58** [Kennel]	--	2.64*** [Kennel]
k_bacteria.p__Firmicutes_A.c__Clostridia.o__Lachnospirales.f__Lachnospiraceae.g__Faecalimonas.s__Faecalimonas_sp900550235	3.56 (1.42)	4.69 (1.03)	3.78 (1.41)	4.18e-05	1.12 [0.539, 1.71]***	0.216 [-0.394, 0.826]	-0.909 [-1.56, -0.255]**	3.33*** [Kennel]	--	2.86** [Kennel]
k_bacteria.p__Firmicutes_A.c__Clostridia.o__Lachnospirales.f__Lachnospiraceae.g__Fusicatenibacter	2.27 (1.27)	3.06 (1.2)	2.22 (1.04)	0.00219	0.787 [0.205, 1.37]**	-0.047 [-0.653, 0.559]	-0.834 [-1.48, -0.184]**	2.27*** [Kennel]	--	2.37*** [Kennel]
k_bacteria.p__Firmicutes_A.c__Clostridia.o__Lachnospirales.f__Lachnospiraceae.g__Fusicatenibacter.s__Fusicatenibacter_saccharivorans	2.29 (1.28)	3.09 (1.03)	2.02 (0.96)	0.000171	0.792 [0.234, 1.35]**	-0.274 [-0.855, 0.307]	-1.07 [-1.69, -0.443]***	2.27*** [Kennel]	--	2.37*** [Kennel]
k_bacteria.p__Firmicutes_A.c__Clostridia.o__Lachnospirales.f__Lachnospiraceae.g__Mediterraneibacter.s__Mediterraneibacter_torques	2.78 (1.14)	3.4 (0.985)	3.04 (1.09)	0.0305	0.617 [0.0708, 1.16]*	0.259 [-0.31, 0.828]	-0.358 [-0.968, 0.252]	2.47*** [Kennel]	--	--
k_bacteria.p__Firmicutes_A.c__Clostridia.o__Lachnospirales.f__Lachnospiraceae.g__Muricomes	1.57 (1.58)	3.03 (1.12)	1.6 (1.22)	1.24e-06	1.47 [0.786, 2.15]***	0.0384 [-0.672, 0.749]	-1.43 [-2.19, -0.668]***	2.87*** [Kennel]	--	2.76*** [Kennel]
k_bacteria.p__Firmicutes_A.c__Clostridia.o__Lachnospirales.f__Lachnospiraceae.g__Muricomes.s__Muricomes_contorta_B	1.06 (1.24)	3.11 (0.967)	1.3 (1.07)	1.16e-14	2.04 [1.49, 2.59]***	0.239 [-0.336, 0.815]	-1.8 [-2.42, -1.19]***	2.87*** [Kennel]	--	2.76*** [Kennel]
k_bacteria.p__Firmicutes_A.c__Clostridia.o__Lachnospirales.f__Lachnospiraceae.g__Robinsoniella.s__Robinsoniella_sp900555455	2.59 (1.15)	3.44 (0.843)	2.58 (0.933)	0.000112	0.849 [0.348, 1.35]***	-0.0162 [-0.537, 0.505]	-0.865 [-1.42, -0.306]**	2.58*** [Kennel]	--	2.64** [Kennel]
k_bacteria.p__Firmicutes_A.c__Clostridia.o__Lachnospirales.f__Lachnospiraceae.g__Ruminococcus_A	3.47 (1.44)	4.54 (1.14)	3.72 (1.15)	0.000478	1.07 [0.43, 1.71]***	0.252 [-0.416, 0.921]	-0.819 [-1.54, -0.103]*	2.84*** [Kennel]	--	--
k_bacteria.p__Firmicutes_A.c__Clostridia.o__Lachnospirales.f__Lachnospiraceae.g__Ruminococcus_A.s__Ruminococcus_A_sp000432335	3.35 (1.38)	4.26 (1.39)	3.76 (1.09)	0.00482	0.91 [0.263, 1.56]**	0.416 [-0.258, 1.09]	-0.494 [-1.22, 0.229]	2.84*** [Kennel]	--	--
k_bacteria.p__Firmicutes_A.c__Clostridia.o__Lachnospirales.f__Lachnospiraceae.g__Schaedlerella	3.94 (1.21)	4.95 (1.27)	4.08 (1.14)	0.000279	1.01 [0.414, 1.61]***	0.145 [-0.475, 0.766]	-0.865 [-1.53, -0.199]**	3.16*** [Kennel]	--	--
k_bacteria.p__Firmicutes_A.c__Clostridia.o__Lachnospirales.f__Lachnospiraceae.g__Schaedlerella.s__	3.41 (1.17)	4.35 (1.22)	3.76 (1.02)	0.000701	0.943 [0.373, 1.51]***	0.359 [-0.236, 0.953]	-0.585 [-1.22, 0.052]	3.14*** [Kennel]	--	2.83* [Kennel]
k_bacteria.p__Firmicutes_A.c__Clostridia.o__Oscillospirales	4.25 (1.41)	5.35 (1.16)	4.46 (1.31)	0.000363	1.1 [0.449, 1.76]***	0.211 [-0.471, 0.893]	-0.893 [-1.62, -0.162]*	3.84*** [Kennel]	--	3.90*** [Kennel]
k_bacteria.p__Firmicutes_A.c__Clostridia.o__Oscillospirales.f__	2.61 (1.31)	3.32 (1.18)	2.67 (1.26)	0.0121	0.718 [0.122, 1.31]*	0.063 [-0.558, 0.684]	-0.655 [-1.32, 0.0106]	2.59*** [Kennel]	--	2.70*** [Kennel]
k_bacteria.p__Firmicutes_A.c__Clostridia.o__Oscillospirales.f__.g__	2.42 (1.02)	3.13 (1)	2.1 (0.842)	3.72e-05	0.706 [0.225, 1.19]**	-0.318 [-0.82, 0.183]	-1.02 [-1.56, -0.487]***	2.59*** [Kennel]	--	2.70*** [Kennel]
k_bacteria.p__Firmicutes_A.c__Clostridia.o__Oscillospirales.f__Butyricicoccaceae	2.56 (1.76)	3.56 (1.51)	2.78 (1.35)	0.00984	1.01 [0.22, 1.79]**	0.224 [-0.595, 1.04]	-0.782 [-1.66, 0.0964]	2.43*** [Kennel]	--	2.12** [Kennel]
k_bacteria.p__Firmicutes_A.c__Clostridia.o__Oscillospirales.f__Butyricicoccaceae.g__Butyricicoccus	1.78 (1.61)	3.58 (1.49)	2.23 (1.33)	1.71e-07	1.79 [1.07, 2.52]***	0.448 [-0.308, 1.2]	-1.35 [-2.16, -0.536]***	2.43*** [Kennel]	--	2.12** [Kennel]
k_bacteria.p__Firmicutes_A.c__Clostridia.o__Oscillospirales.f__Butyricicoccaceae.g__Butyricicoccus.s__Butyricicoccus_pullicaecorum	1.72 (1.61)	3.14 (1.43)	2.58 (1.24)	1.7e-05	1.42 [0.721, 2.12]***	0.861 [0.131, 1.59]*	-0.561 [-1.34, 0.221]	2.43*** [Kennel]	--	2.12** [Kennel]
k_bacteria.p__Firmicutes_A.c__Clostridia.o__Oscillospirales.f__Oscillospiraceae	3.61 (1.21)	4.32 (1.24)	3.85 (1.2)	0.0226	0.712 [0.106, 1.32]*	0.242 [-0.389, 0.873]	-0.47 [-1.15, 0.207]	2.88*** [Kennel]	--	2.83*** [Kennel]
k_bacteria.p__Firmicutes_A.c__Clostridia.o__Oscillospirales.f__Oscillospiraceae.g__Lawsonibacter	2.46 (1.32)	2.5 (1.09)	1.59 (1.19)	0.000814	0.0361 [-0.532, 0.604]	-0.871 [-1.46, -0.279]**	-0.907 [-1.54, -0.273]**	--	2.04* [Pet]	--
k_bacteria.p__Firmicutes_A.c__Clostridia.o__Oscillospirales.f__Oscillospiraceae.g__Lawsonibacter.s__Lawsonibacter_sp000177015	2.03 (1.26)	2.11 (0.908)	1.36 (1.17)	0.00547	0.0711 [-0.462, 0.605]	-0.674 [-1.23, -0.118]*	-0.745 [-1.34, -0.15]*	--	2.04* [Pet]	--
k_bacteria.p__Firmicutes_A.c__Clostridia.o__Oscillospirales.f__Ruminococcaceae	4.1 (1.49)	5.21 (1.42)	4.29 (1.42)	0.00101	1.11 [0.399, 1.82]***	0.194 [-0.547, 0.935]	-0.916 [-1.71, -0.121]*	3.79*** [Kennel]	--	3.86*** [Kennel]
k_bacteria.p__Firmicutes_A.c__Clostridia.o__Oscillospirales.f__Ruminococcaceae.g__Faecalibacterium	3.37 (1.29)	5.02 (1.37)	3.64 (1.4)	2.38e-08	1.64 [1.01, 2.28]***	0.27 [-0.39, 0.929]	-1.37 [-2.08, -0.668]***	3.84*** [Kennel]	--	3.82*** [Kennel]
k_bacteria.p__Firmicutes_A.c__Clostridia.o__Oscillospirales.f__Ruminococcaceae.g__Faecalibacterium.s__	1.27 (1.32)	2.97 (1.45)	1.72 (1.33)	1.34e-08	1.7 [1.07, 2.33]***	0.444 [-0.212, 1.1]	-1.26 [-1.96, -0.554]***	2.38*** [Kennel]	--	2.14*** [Kennel]
k_bacteria.p__Firmicutes_A.c__Clostridia.o__Oscillospirales.f__Ruminococcaceae.g__Faecalibacterium.s__Faecalibacterium_sp900540455	3.14 (1.7)	4.61 (1.35)	3.59 (1.22)	3.42e-05	1.46 [0.725, 2.2]***	0.448 [-0.321, 1.22]	-1.01 [-1.84, -0.19]*	3.84*** [Kennel]	--	3.82*** [Kennel]
k_bacteria.p__Firmicutes_A.c__Clostridia.o__Oscillospirales.f__Ruminococcaceae.g__Fournierella	1.81 (1.84)	3.39 (1.28)	2.18 (1.48)	9.3e-06	1.58 [0.822, 2.33]***	0.365 [-0.421, 1.15]	-1.21 [-2.05, -0.369]**	2.30*** [Kennel]	--	2.26* [Kennel]
k_bacteria.p__Firmicutes_A.c__Clostridia.o__Oscillospirales.f__Ruminococcaceae.g__Fournierella.s__Fournierella_massiliensis	1.7 (1.7)	3.07 (1.24)	2.17 (1.18)	1.4e-05	1.36 [0.708, 2.02]***	0.463 [-0.219, 1.15]	-0.9 [-1.63, -0.169]*	2.30*** [Kennel]	--	2.26* [Kennel]
k_bacteria.p__Firmicutes_A.c__Clostridia.o__Oscillospirales.f__Ruminococcaceae.g__Negativibacillus	2.57 (1.07)	3.6 (1.32)	2.62 (1.19)	6.61e-05	1.03 [0.455, 1.6]***	0.048 [-0.55, 0.646]	-0.982 [-1.62, -0.341]**	2.64*** [Kennel]	--	--
k_bacteria.p__Firmicutes_A.c__Clostridia.o__Oscillospirales.f__Ruminococcaceae.g__Negativibacillus.s__Negativibacillus_sp000435195	2.52 (1.17)	3.22 (1.27)	2.71 (0.896)	0.0106	0.699 [0.153, 1.24]**	0.196 [-0.373, 0.764]	-0.503 [-1.11, 0.106]	2.64*** [Kennel]	--	--
k_bacteria.p__Firmicutes_A.c__Clostridia.o__Peptostreptococcales	5.38 (1.48)	6.48 (1.33)	5.88 (1.43)	0.00103	1.11 [0.418, 1.8]***	0.497 [-0.22, 1.21]	-0.61 [-1.38, 0.159]	4.49*** [Kennel]	--	4.43*** [Kennel]
k_bacteria.p__Firmicutes_A.c__Clostridia.o__Peptostreptococcales.f__Peptostreptococcaceae	5.54 (1.49)	6.44 (1.19)	5.64 (1.36)	0.00636	0.896 [0.207, 1.59]**	0.0931 [-0.625, 0.811]	-0.803 [-1.57, -0.0332]*	4.48*** [Kennel]	--	4.43*** [Kennel]
k_bacteria.p__Firmicutes_A.c__Clostridia.o__Peptostreptococcales.f__Peptostreptococcaceae.g__	3.26 (1.14)	4 (1.05)	3.28 (1.03)	0.00192	0.732 [0.213, 1.25]**	0.0136 [-0.527, 0.555]	-0.719 [-1.3, -0.139]*	2.34*** [Kennel]	--	2.31** [Kennel]
k_bacteria.p__Firmicutes_A.c__Clostridia.o__Peptostreptococcales.f__Peptostreptococcaceae.g__.s__	3.05 (1.26)	3.52 (0.887)	3.71 (0.995)	0.016	0.467 [-0.0782, 1.01]	0.657 [0.089, 1.23]*	0.19 [-0.419, 0.799]	--	--	--
k_bacteria.p__Firmicutes_A.c__Clostridia.o__Peptostreptococcales.f__Peptostreptococcaceae.g__Clostridioides	3.02 (1.15)	3.16 (1.05)	2.51 (1.08)	0.033	0.139 [-0.412, 0.69]	-0.513 [-1.09, 0.0607]	-0.652 [-1.27, -0.037]*	--	--	--
k_bacteria.p__Firmicutes_A.c__Clostridia.o__Peptostreptococcales.f__Peptostreptococcaceae.g__Clostridioides.s__Clostridioides_sp002390935	1.85 (1.18)	2.7 (0.869)	1.95 (1.08)	0.000383	0.857 [0.337, 1.38]***	0.102 [-0.44, 0.644]	-0.755 [-1.34, -0.174]**	2.79*** [Kennel]	--	2.82*** [Kennel]
k_bacteria.p__Firmicutes_A.c__Clostridia.o__Peptostreptococcales.f__Peptostreptococcaceae.g__Clostridium_U	4.91 (1.66)	6.12 (1.1)	5.36 (1.4)	0.000425	1.21 [0.504, 1.92]***	0.447 [-0.289, 1.18]	-0.763 [-1.55, 0.026]	4.40*** [Kennel]	--	4.39*** [Kennel]
k_bacteria.p__Firmicutes_A.c__Clostridia.o__Peptostreptococcales.f__Peptostreptococcaceae.g__Clostridium_U.s__	3.7 (1.9)	5.34 (0.865)	4.45 (0.964)	1.43e-06	1.64 [0.93, 2.35]***	0.749 [0.0108, 1.49]*	-0.89 [-1.68, -0.0982]*	3.66*** [Kennel]	2.85* [UIUC]	3.65*** [Kennel]
k_bacteria.p__Firmicutes_A.c__Clostridia.o__Peptostreptococcales.f__Peptostreptococcaceae.g__Clostridium_U.s__Clostridium_U_hiranonis	4.11 (1.81)	6 (1.03)	4.9 (1.31)	9.03e-08	1.9 [1.16, 2.64]***	0.792 [0.0231, 1.56]*	-1.11 [-1.93, -0.281]**	4.21*** [Kennel]	3.60** [UIUC]	4.16*** [Kennel]
k_bacteria.p__Firmicutes_A.c__Clostridia.o__Peptostreptococcales.f__Peptostreptococcaceae.g__Clostridium_U.s__Clostridium_U_sp900539645	4.26 (1.47)	5.57 (0.94)	4.56 (1.18)	7.16e-06	1.32 [0.693, 1.94]***	0.301 [-0.347, 0.949]	-1.01 [-1.71, -0.319]**	3.63*** [Kennel]	--	3.76*** [Kennel]
k_bacteria.p__Firmicutes_A.c__Clostridia.o__Peptostreptococcales.f__Peptostreptococcaceae.g__Intestinibacter	2.2 (0.956)	3.06 (1.14)	2.9 (1.17)	0.000396	0.855 [0.319, 1.39]***	0.694 [0.135, 1.25]*	-0.161 [-0.76, 0.437]	2.81*** [Kennel]	2.14*** [UIUC]	--
k_bacteria.p__Firmicutes_A.c__Clostridia.o__Peptostreptococcales.f__Peptostreptococcaceae.g__Intestinibacter.s__Intestinibacter_bartlettii	2.12 (1)	3.24 (0.847)	2.52 (0.977)	7.47e-07	1.13 [0.651, 1.6]***	0.409 [-0.0856, 0.903]	-0.716 [-1.25, -0.187]**	2.81*** [Kennel]	--	--
k_bacteria.p__Firmicutes_A.c__Clostridia.o__Peptostreptococcales.f__Peptostreptococcaceae.g__Romboutsia	3.88 (1.22)	5.07 (1.16)	4.97 (1.14)	1.54e-06	1.2 [0.611, 1.78]***	1.1 [0.487, 1.7]***	-0.1 [-0.753, 0.553]	3.69*** [Kennel]	3.39*** [UIUC]	3.29* [Kennel]
k_bacteria.p__Firmicutes_A.c__Clostridia.o__Peptostreptococcales.f__Peptostreptococcaceae.g__Romboutsia.s__	3.83 (1.23)	4.37 (0.901)	3.64 (0.774)	0.0073	0.539 [0.0236, 1.05]*	-0.193 [-0.73, 0.344]	-0.732 [-1.31, -0.156]**	2.85*** [Kennel]	--	2.65** [Kennel]
k_bacteria.p__Firmicutes_A.c__Clostridia.o__Peptostreptococcales.f__Peptostreptococcaceae.g__Romboutsia.s__Romboutsia_dakarensis	1.45 (1.28)	2.49 (1.03)	2.27 (1.12)	5.85e-05	1.04 [0.463, 1.62]***	0.827 [0.226, 1.43]**	-0.213 [-0.856, 0.431]	2.27*** [Kennel]	2.74*** [UIUC]	--
k_bacteria.p__Firmicutes_A.c__Clostridia.o__Peptostreptococcales.f__Peptostreptococcaceae.g__Romboutsia.s__Romboutsia_timonensis	2.38 (1.73)	4.77 (0.948)	4.41 (1.36)	1.77e-13	2.39 [1.68, 3.11]***	2.03 [1.29, 2.78]***	-0.358 [-1.16, 0.442]	3.62*** [Kennel]	3.32*** [UIUC]	3.18* [Kennel]
k_bacteria.p__Firmicutes_A.c__Clostridia.o__Peptostreptococcales.f__Peptostreptococcaceae.g__Terrisporobacter	2.28 (1.63)	2.92 (1.36)	3.46 (1.23)	0.001	0.645 [-0.0715, 1.36]	1.18 [0.438, 1.93]***	0.539 [-0.261, 1.34]	--	2.20*** [UIUC]	--
k_bacteria.p__Firmicutes_A.c__Clostridia.o__Peptostreptococcales.f__Peptostreptococcaceae.g__Terrisporobacter.s__	1.67 (1.61)	2.11 (1.06)	2.63 (1.19)	0.00462	0.442 [-0.214, 1.1]	0.962 [0.279, 1.64]**	0.52 [-0.212, 1.25]	--	--	--
k_bacteria.p__Firmicutes_A.c__Clostridia.o__Peptostreptococcales.f__Peptostreptococcaceae.g__Terrisporobacter.s__Terrisporobacter_glycolicus	1.65 (1.53)	2.61 (1.13)	2.83 (1.24)	6.68e-05	0.96 [0.306, 1.61]**	1.18 [0.497, 1.86]***	0.218 [-0.512, 0.949]	2.18** [Kennel]	--	--
k_bacteria.p__Firmicutes_A.c__Clostridia.o__Peptostreptococcales.f__Peptostreptococcaceae.g__Terrisporobacter.s__Terrisporobacter_glycolicus_A	1.64 (1.57)	2.36 (1.27)	2.84 (1.31)	0.000469	0.717 [0.0234, 1.41]*	1.2 [0.474, 1.92]***	0.479 [-0.295, 1.25]	2.32* [Pet]	2.02*** [Pet]	--
k_bacteria.p__Firmicutes_A.c__Clostridia.o__Peptostreptococcales.f__Thermotaleaceae	3.55 (1.28)	4.29 (1.22)	3.74 (1.41)	0.0229	0.742 [0.101, 1.38]*	0.186 [-0.481, 0.853]	-0.556 [-1.27, 0.159]	2.50*** [Kennel]	--	2.43*** [Kennel]
k_bacteria.p__Firmicutes_A.c__Clostridia.o__Peptostreptococcales.f__Thermotaleaceae.g__Inediibacterium	3.27 (1.01)	3.82 (0.976)	3.7 (0.9)	0.0191	0.542 [0.0593, 1.03]*	0.43 [-0.0735, 0.933]	-0.113 [-0.652, 0.427]	2.50*** [Kennel]	--	2.43*** [Kennel]
k_bacteria.p__Firmicutes_A.c__Clostridia.o__Peptostreptococcales.f__Thermotaleaceae.g__Inediibacterium.s__Inediibacterium_massiliense	3.09 (0.795)	3.81 (0.941)	3.45 (0.955)	0.000778	0.721 [0.281, 1.16]***	0.357 [-0.102, 0.815]	-0.364 [-0.856, 0.127]	2.50*** [Kennel]	--	2.43*** [Kennel]
k_bacteria.p__Firmicutes_C	3.25 (2.25)	3.75 (1.99)	2.45 (1.67)	0.011	0.505 [-0.401, 1.41]	-0.793 [-1.74, 0.151]	-1.3 [-2.31, -0.286]**	--	--	--
k_bacteria.p__Firmicutes_C.c__Negativicutes.o__Acidaminococcales	1.91 (1.7)	3.14 (1.62)	2.52 (1.41)	0.00121	1.23 [0.453, 2]***	0.608 [-0.2, 1.42]	-0.621 [-1.49, 0.245]	2.19*** [Kennel]	--	2.21** [Kennel]
k_bacteria.p__Firmicutes_C.c__Negativicutes.o__Acidaminococcales.f__Acidaminococcaceae	1.91 (1.66)	3.17 (1.51)	2.5 (1.39)	0.000388	1.26 [0.528, 1.99]***	0.593 [-0.167, 1.35]	-0.665 [-1.48, 0.15]	2.19*** [Kennel]	--	2.21** [Kennel]
k_bacteria.p__Firmicutes_C.c__Negativicutes.o__Acidaminococcales.f__Acidaminococcaceae.g__Phascolarctobacterium_A	1.64 (1.37)	2.93 (1.45)	2.27 (1.39)	3.69e-05	1.28 [0.636, 1.93]***	0.631 [-0.0442, 1.31]	-0.653 [-1.38, 0.0702]	2.19*** [Kennel]	--	2.21** [Kennel]
k_bacteria.p__Firmicutes_C.c__Negativicutes.o__Acidaminococcales.f__Acidaminococcaceae.g__Phascolarctobacterium_A.s__Phascolarctobacterium_A_sp900544885	1.18 (1.19)	2.72 (1.34)	1.49 (1.22)	5.71e-09	1.54 [0.977, 2.1]***	0.307 [-0.277, 0.891]	-1.23 [-1.86, -0.604]***	2.18*** [Kennel]	--	2.20** [Kennel]
k_bacteria.p__Firmicutes_C.c__Negativicutes.o__Acidaminococcales.f__Acidaminococcaceae.g__Phascolarctobacterium_A.s__Phascolarctobacterium_A_sp900547415	1.15 (1.53)	2.58 (1.28)	1.13 (1.16)	7.42e-07	1.43 [0.77, 2.09]***	-0.0229 [-0.713, 0.667]	-1.45 [-2.19, -0.715]***	2.84*** [Kennel]	--	2.71*** [Kennel]
k_bacteria.p__Firmicutes_C.c__Negativicutes.o__Selenomonadales	3.32 (2.13)	3.66 (2.02)	1.45 (1.98)	1.49e-06	0.342 [-0.582, 1.27]	-1.87 [-2.83, -0.903]***	-2.21 [-3.24, -1.18]***	--	3.61*** [Pet]	--
k_bacteria.p__Firmicutes_C.c__Negativicutes.o__Selenomonadales.f__Selenomonadaceae	3.5 (2.37)	3.74 (1.96)	1.6 (2.09)	6.16e-06	0.241 [-0.735, 1.22]	-1.91 [-2.92, -0.89]***	-2.15 [-3.24, -1.06]***	--	3.61*** [Pet]	--
k_bacteria.p__Firmicutes_C.c__Negativicutes.o__Selenomonadales.f__Selenomonadaceae.g__Megamonas	3.2 (2.09)	3.41 (1.94)	1.33 (1.96)	6.5e-07	0.21 [-0.651, 1.07]	-1.86 [-2.76, -0.966]***	-2.07 [-3.03, -1.11]***	--	3.61*** [Pet]	--
k_bacteria.p__Firmicutes_C.c__Negativicutes.o__Selenomonadales.f__Selenomonadaceae.g__Megamonas.s__Megamonas_funiformis	3.12 (2.07)	3.59 (1.94)	1.26 (1.67)	4.92e-08	0.467 [-0.375, 1.31]	-1.86 [-2.74, -0.987]***	-2.33 [-3.27, -1.39]***	--	3.61*** [Pet]	--
k_bacteria.p__Firmicutes_C.c__Negativicutes.o__Veillonellales	0.154 (0.472)	2.23 (1.84)	0.753 (1.27)	2.49e-13	2.08 [1.5, 2.65]***	0.599 [-0.00146, 1.2]	-1.48 [-2.12, -0.834]***	2.48*** [Kennel]	--	2.51*** [Kennel]
k_bacteria.p__Firmicutes_C.c__Negativicutes.o__Veillonellales.f__Veillonellaceae	0 (0)	1.71 (2.25)	0 (0)	5.51e-12	1.71 [1.16, 2.26]***	-3.33e-16 [-0.573, 0.573]	-1.71 [-2.32, -1.09]***	2.47*** [Kennel]	--	2.51*** [Kennel]
k_bacteria.p__Firmicutes_C.c__Negativicutes.o__Veillonellales.f__Veillonellaceae.g__Veillonella_A	0 (0)	1.7 (2.08)	0 (0)	1.31e-14	1.7 [1.22, 2.18]***	3.33e-16 [-0.5, 0.5]	-1.7 [-2.23, -1.16]***	2.49*** [Kennel]	--	2.51*** [Kennel]
k_bacteria.p__Firmicutes_C.c__Negativicutes.o__Veillonellales.f__Veillonellaceae.g__Veillonella_A.s__Veillonella_A_magna	0 (0)	1.39 (1.84)	0 (0)	1.11e-11	1.39 [0.936, 1.85]***	7.77e-16 [-0.475, 0.475]	-1.39 [-1.9, -0.883]***	2.47*** [Kennel]	--	2.50*** [Kennel]
k_bacteria.p__Firmicutes.c__	1.4 (2.1)	3.53 (2.06)	1.46 (2.08)	1.14e-06	2.13 [1.14, 3.11]***	0.0644 [-0.961, 1.09]	-2.06 [-3.16, -0.965]***	2.61*** [Kennel]	--	2.79*** [Kennel]
k_bacteria.p__Firmicutes.c__.o__	1.52 (2.22)	3.46 (1.88)	1.23 (1.91)	7.64e-07	1.94 [0.99, 2.9]***	-0.294 [-1.29, 0.701]	-2.24 [-3.3, -1.17]***	2.60*** [Kennel]	--	2.79*** [Kennel]
k_bacteria.p__Firmicutes.c__.o__.f__	1.54 (2.11)	3.46 (1.63)	1.11 (1.67)	5.11e-08	1.92 [1.04, 2.81]***	-0.436 [-1.36, 0.486]	-2.36 [-3.35, -1.37]***	2.60*** [Kennel]	--	2.79*** [Kennel]
k_bacteria.p__Firmicutes.c__.o__.f__.g__	1.37 (2.11)	3.17 (1.7)	1.21 (1.76)	2.19e-06	1.8 [0.901, 2.69]***	-0.16 [-1.09, 0.774]	-1.96 [-2.96, -0.957]***	2.61*** [Kennel]	--	2.79*** [Kennel]
k_bacteria.p__Firmicutes.c__.o__.f__.g__.s__	1.27 (1.83)	3.15 (1.64)	1.07 (1.54)	9.34e-09	1.89 [1.11, 2.67]***	-0.199 [-1.01, 0.611]	-2.09 [-2.96, -1.22]***	2.61*** [Kennel]	--	2.79*** [Kennel]
k_bacteria.p__Firmicutes.c__Bacilli.o__	3.74 (1.37)	4.08 (1.2)	3.28 (1.2)	0.0293	0.341 [-0.291, 0.974]	-0.46 [-1.12, 0.199]	-0.802 [-1.51, -0.0953]*	--	--	--
k_bacteria.p__Firmicutes.c__Bacilli.o__.f__.g__.s__	3.69 (1.12)	3.78 (1.03)	2.71 (0.891)	1.23e-05	0.0932 [-0.414, 0.6]	-0.974 [-1.5, -0.445]***	-1.07 [-1.63, -0.5]***	--	--	--
k_bacteria.p__Firmicutes.c__Bacilli.o__Bacillales	3.44 (1.74)	3.65 (1.29)	2.8 (1.34)	0.0457	0.213 [-0.54, 0.966]	-0.644 [-1.43, 0.14]	-0.857 [-1.7, -0.017]*	--	--	--
k_bacteria.p__Firmicutes.c__Bacilli.o__Bacillales.f__Halobacillaceae	1.17 (1.34)	3.4 (1.45)	1.62 (1.48)	1.41e-12	2.23 [1.58, 2.88]***	0.447 [-0.234, 1.13]	-1.78 [-2.51, -1.05]***	2.70*** [Kennel]	--	2.13*** [Kennel]
k_bacteria.p__Firmicutes.c__Bacilli.o__Bacillales.f__Halobacillaceae.g__Pontibacillus	1.31 (1.35)	3.1 (1.31)	1.52 (1.27)	2.12e-10	1.79 [1.18, 2.39]***	0.209 [-0.423, 0.841]	-1.58 [-2.26, -0.901]***	2.70*** [Kennel]	--	2.13*** [Kennel]
k_bacteria.p__Firmicutes.c__Bacilli.o__Bacillales.f__Halobacillaceae.g__Pontibacillus.s__Pontibacillus_litoralis	1.2 (1.3)	2.64 (1.35)	1.39 (1.31)	1.45e-07	1.44 [0.845, 2.04]***	0.188 [-0.432, 0.809]	-1.25 [-1.92, -0.587]***	2.70*** [Kennel]	--	2.13*** [Kennel]
k_bacteria.p__Firmicutes.c__Bacilli.o__Bacillales.f__Planococcaceae.g__Rummeliibacillus.s__	2.22 (1.38)	1.78 (1.2)	1.14 (0.96)	0.000371	-0.438 [-1.04, 0.161]	-1.08 [-1.7, -0.456]***	-0.642 [-1.31, 0.0265]	--	2.10*** [Pet]	--
k_bacteria.p__Firmicutes.c__Bacilli.o__Erysipelotrichales.f__Erysipelatoclostridiaceae	5.04 (1.17)	4.84 (1.39)	3.69 (1.33)	8.39e-06	-0.202 [-0.829, 0.426]	-1.35 [-2, -0.697]***	-1.15 [-1.85, -0.448]***	--	3.65*** [Pet]	--
k_bacteria.p__Firmicutes.c__Bacilli.o__Erysipelotrichales.f__Erysipelatoclostridiaceae.g__	2.5 (1.47)	3.4 (1.28)	2.22 (1.75)	0.00104	0.9 [0.195, 1.61]**	-0.28 [-1.01, 0.454]	-1.18 [-1.97, -0.393]**	2.23*** [Kennel]	--	--
k_bacteria.p__Firmicutes.c__Bacilli.o__Erysipelotrichales.f__Erysipelatoclostridiaceae.g__.s__	2.55 (1.56)	3.05 (1.22)	2.09 (1.5)	0.0103	0.491 [-0.169, 1.15]	-0.464 [-1.15, 0.224]	-0.955 [-1.69, -0.218]**	--	--	--
k_bacteria.p__Firmicutes.c__Bacilli.o__Erysipelotrichales.f__Erysipelatoclostridiaceae.g__Catenibacterium	1.18 (1.7)	3.4 (1.7)	1.22 (1.66)	3.68e-10	2.22 [1.43, 3.02]***	0.042 [-0.783, 0.867]	-2.18 [-3.07, -1.3]***	2.75*** [Kennel]	--	2.93*** [Kennel]
k_bacteria.p__Firmicutes.c__Bacilli.o__Erysipelotrichales.f__Erysipelatoclostridiaceae.g__Catenibacterium.s__Catenibacterium_mitsuokai	1.27 (1.79)	3.18 (1.73)	1.13 (1.56)	2.45e-08	1.91 [1.11, 2.7]***	-0.141 [-0.973, 0.69]	-2.05 [-2.94, -1.16]***	2.74*** [Kennel]	--	2.93*** [Kennel]
k_bacteria.p__Firmicutes.c__Bacilli.o__Erysipelotrichales.f__Erysipelatoclostridiaceae.g__Erysipelatoclostridium	4.51 (1.2)	4.4 (1.11)	3.62 (1.24)	0.00166	-0.112 [-0.69, 0.467]	-0.895 [-1.5, -0.292]**	-0.783 [-1.43, -0.137]*	--	3.61*** [Pet]	--
k_bacteria.p__Firmicutes.c__Bacilli.o__Erysipelotrichales.f__Erysipelatoclostridiaceae.g__Erysipelatoclostridium.s__	2.99 (1.45)	3.78 (0.964)	3.16 (0.981)	0.0047	0.789 [0.217, 1.36]**	0.167 [-0.429, 0.764]	-0.622 [-1.26, 0.0172]	2.63*** [Kennel]	--	2.79*** [Kennel]
k_bacteria.p__Firmicutes.c__Bacilli.o__Erysipelotrichales.f__Erysipelatoclostridiaceae.g__Erysipelatoclostridium.s__Erysipelatoclostridium_ramosum	4 (1.32)	2.38 (0.988)	2.43 (1.44)	2.91e-10	-1.62 [-2.23, -1.01]***	-1.57 [-2.21, -0.937]***	0.0458 [-0.635, 0.727]	3.60*** [Pet]	3.59*** [Pet]	--
k_bacteria.p__Firmicutes.c__Bacilli.o__Erysipelotrichales.f__Erysipelatoclostridiaceae.g__Erysipelatoclostridium.s__Erysipelatoclostridium_sp000752095	0.829 (1.23)	2.96 (1.71)	0.944 (1.57)	5.42e-12	2.13 [1.46, 2.8]***	0.115 [-0.584, 0.815]	-2.01 [-2.76, -1.26]***	2.59*** [Kennel]	--	2.46*** [Kennel]
k_bacteria.p__Firmicutes.c__Bacilli.o__Erysipelotrichales.f__Erysipelatoclostridiaceae.g__Erysipelatoclostridium.s__Erysipelatoclostridium_sp003024675	0.767 (1.16)	1.81 (1.1)	0.907 (1.23)	2.21e-05	1.05 [0.511, 1.58]***	0.14 [-0.417, 0.697]	-0.906 [-1.5, -0.309]**	2.87*** [Kennel]	--	2.43*** [Kennel]
k_bacteria.p__Firmicutes.c__Bacilli.o__Erysipelotrichales.f__Erysipelatoclostridiaceae.g__Erysipelatoclostridium.s__Erysipelatoclostridium_spiroforme	1.41 (1.46)	2.4 (1.47)	0.852 (1.22)	8.06e-07	0.984 [0.385, 1.58]***	-0.561 [-1.19, 0.0628]	-1.55 [-2.21, -0.877]***	2.73** [Pet]	--	2.68*** [Kennel]
k_bacteria.p__Firmicutes.c__Bacilli.o__Erysipelotrichales.f__Erysipelatoclostridiaceae.g__Kandleria	0.874 (1.29)	2.64 (1.28)	1.19 (1.35)	7.3e-10	1.77 [1.16, 2.38]***	0.313 [-0.324, 0.95]	-1.46 [-2.14, -0.775]***	2.29*** [Kennel]	--	2.22*** [Kennel]
k_bacteria.p__Firmicutes.c__Bacilli.o__Erysipelotrichales.f__Erysipelatoclostridiaceae.g__Kandleria.s__Kandleria_vitulina	0.921 (1.35)	2.66 (1.38)	1.02 (1.19)	5.62e-10	1.74 [1.12, 2.36]***	0.103 [-0.54, 0.746]	-1.64 [-2.33, -0.947]***	2.29*** [Kennel]	--	2.21*** [Kennel]
k_bacteria.p__Firmicutes.c__Bacilli.o__Erysipelotrichales.f__Erysipelatoclostridiaceae.g__Longibaculum	1.4 (1.34)	3.15 (1.05)	1.47 (1.29)	2.72e-10	1.75 [1.14, 2.36]***	0.0716 [-0.566, 0.709]	-1.68 [-2.36, -0.993]***	2.74*** [Kennel]	--	2.74*** [Kennel]
k_bacteria.p__Firmicutes.c__Bacilli.o__Erysipelotrichales.f__Erysipelatoclostridiaceae.g__Longibaculum.s__Longibaculum_muris	1.29 (1.32)	2.94 (1.11)	1.36 (1.19)	9.38e-10	1.65 [1.05, 2.24]***	0.0758 [-0.545, 0.696]	-1.57 [-2.24, -0.906]***	2.74*** [Kennel]	--	2.74*** [Kennel]
k_bacteria.p__Firmicutes.c__Bacilli.o__Erysipelotrichales.f__Erysipelotrichaceae	4.88 (1.52)	6.14 (1.43)	5.89 (1.38)	0.000109	1.26 [0.534, 1.99]***	1.01 [0.256, 1.77]**	-0.247 [-1.06, 0.564]	4.26*** [Kennel]	4.39*** [UIUC]	--
k_bacteria.p__Firmicutes.c__Bacilli.o__Erysipelotrichales.f__Erysipelotrichaceae.g__Allobaculum	3.07 (1.67)	5.48 (1.38)	5.03 (1.38)	3.13e-12	2.41 [1.65, 3.17]***	1.96 [1.17, 2.75]***	-0.45 [-1.3, 0.398]	3.96*** [Kennel]	4.01*** [UIUC]	3.63* [UIUC]
k_bacteria.p__Firmicutes.c__Bacilli.o__Erysipelotrichales.f__Erysipelotrichaceae.g__Allobaculum.s__	2.23 (1.06)	3.8 (1.27)	3.71 (1.57)	3.18e-09	1.58 [0.95, 2.21]***	1.48 [0.83, 2.14]***	-0.0936 [-0.794, 0.607]	2.98*** [Kennel]	3.91*** [UIUC]	--
k_bacteria.p__Firmicutes.c__Bacilli.o__Erysipelotrichales.f__Erysipelotrichaceae.g__Allobaculum.s__Allobaculum_stercoricanis	2.15 (2.51)	4.94 (1.53)	4.15 (1.61)	2e-09	2.78 [1.78, 3.79]***	2 [0.95, 3.04]***	-0.787 [-1.91, 0.334]	3.91*** [Kennel]	3.32*** [UIUC]	3.87*** [Kennel]
k_bacteria.p__Firmicutes.c__Bacilli.o__Erysipelotrichales.f__Erysipelotrichaceae.g__Dubosiella	0.0386 (0.246)	1.89 (1.91)	2.5 (2.12)	1.33e-13	1.85 [1.16, 2.55]***	2.47 [1.74, 3.19]***	0.615 [-0.161, 1.39]	2.62*** [Kennel]	3.39*** [UIUC]	--
k_bacteria.p__Firmicutes.c__Bacilli.o__Erysipelotrichales.f__Erysipelotrichaceae.g__Dubosiella.s__Dubosiella_newyorkensis	0.0249 (0.183)	1.64 (1.62)	2.38 (1.99)	3.61e-14	1.61 [0.982, 2.24]***	2.35 [1.7, 3.01]***	0.74 [0.0372, 1.44]*	2.62*** [Kennel]	3.39*** [UIUC]	--
k_bacteria.p__Firmicutes.c__Bacilli.o__Erysipelotrichales.f__Erysipelotrichaceae.g__Faecalibaculum	0.0374 (0.236)	2.68 (2.27)	3.65 (2.54)	5.97e-18	2.64 [1.81, 3.48]***	3.62 [2.75, 4.49]***	0.975 [0.0426, 1.91]*	3.21*** [Kennel]	4.09*** [UIUC]	4.08** [UIUC]
k_bacteria.p__Firmicutes.c__Bacilli.o__Erysipelotrichales.f__Erysipelotrichaceae.g__Faecalibaculum.s__Faecalibaculum_rodentium	0.0279 (0.146)	2.5 (2.11)	3.6 (2.52)	2.74e-17	2.47 [1.63, 3.3]***	3.57 [2.7, 4.44]***	1.1 [0.169, 2.03]*	3.21*** [Kennel]	4.09*** [UIUC]	4.08** [UIUC]
k_bacteria.p__Firmicutes.c__Bacilli.o__Erysipelotrichales.f__Erysipelotrichaceae.g__Holdemanella	3.18 (1.61)	5.31 (1.52)	3.51 (1.57)	4.28e-10	2.13 [1.4, 2.86]***	0.331 [-0.428, 1.09]	-1.8 [-2.61, -0.986]***	3.89*** [Kennel]	--	3.90*** [Kennel]
k_bacteria.p__Firmicutes.c__Bacilli.o__Erysipelotrichales.f__Erysipelotrichaceae.g__Holdemanella.s__	0.944 (1.61)	3.36 (1.41)	1.42 (1.73)	1.41e-12	2.41 [1.71, 3.12]***	0.475 [-0.263, 1.21]	-1.94 [-2.73, -1.15]***	2.35*** [Kennel]	--	2.33*** [Kennel]
k_bacteria.p__Firmicutes.c__Bacilli.o__Erysipelotrichales.f__Erysipelotrichaceae.g__Holdemanella.s__Holdemanella_biformis	2.28 (1.5)	3.37 (1.37)	1.8 (1.35)	5.46e-06	1.08 [0.413, 1.75]***	-0.485 [-1.18, 0.214]	-1.57 [-2.32, -0.82]***	2.45*** [Kennel]	--	2.44*** [Kennel]
k_bacteria.p__Firmicutes.c__Bacilli.o__Erysipelotrichales.f__Erysipelotrichaceae.g__Holdemanella.s__Holdemanella_sp002299315	3.31 (1.68)	4.87 (1.29)	3.38 (1.43)	4.42e-07	1.56 [0.865, 2.24]***	0.0652 [-0.653, 0.784]	-1.49 [-2.26, -0.72]***	3.86*** [Kennel]	--	3.87*** [Kennel]
k_bacteria.p__Firmicutes.c__Bacilli.o__Erysipelotrichales.f__Erysipelotrichaceae.g__Ileibacterium	0.0831 (0.387)	2.33 (2.09)	2.62 (2.15)	4.73e-13	2.25 [1.47, 3.03]***	2.53 [1.72, 3.35]***	0.289 [-0.583, 1.16]	2.45*** [Kennel]	2.77*** [UIUC]	--
k_bacteria.p__Firmicutes.c__Bacilli.o__Erysipelotrichales.f__Erysipelotrichaceae.g__Ileibacterium.s__Ileibacterium_valens	0.0908 (0.418)	2.45 (1.99)	2.33 (1.99)	2.72e-13	2.36 [1.61, 3.1]***	2.24 [1.47, 3.01]***	-0.116 [-0.946, 0.713]	2.45*** [Kennel]	2.77*** [UIUC]	--
k_bacteria.p__Firmicutes.c__Bacilli.o__Erysipelotrichales.f__Erysipelotrichaceae.g__Longicatena	4.04 (1.31)	3.99 (1.28)	3.32 (1.25)	0.0238	-0.0533 [-0.682, 0.575]	-0.722 [-1.38, -0.0672]*	-0.669 [-1.37, 0.0331]	--	2.67* [Pet]	--
k_bacteria.p__Firmicutes.c__Bacilli.o__Erysipelotrichales.f__Erysipelotrichaceae.g__Longicatena.s__Longicatena_innocuum	3.16 (1.24)	2.9 (1.01)	2.48 (0.973)	0.0177	-0.266 [-0.802, 0.271]	-0.68 [-1.24, -0.121]*	-0.415 [-1.01, 0.184]	--	2.22*** [Pet]	--
k_bacteria.p__Firmicutes.c__Bacilli.o__Haloplasmatales	3.11 (1.87)	4.91 (1.38)	4.85 (1.52)	1.43e-07	1.79 [0.975, 2.61]***	1.74 [0.884, 2.59]***	-0.057 [-0.971, 0.857]	3.71*** [Kennel]	3.86*** [UIUC]	--
k_bacteria.p__Firmicutes.c__Bacilli.o__Haloplasmatales.f__Turicibacteraceae	3.13 (1.9)	5.11 (1.32)	4.93 (1.53)	2.09e-08	1.98 [1.16, 2.81]***	1.8 [0.944, 2.66]***	-0.178 [-1.1, 0.743]	3.71*** [Kennel]	3.86*** [UIUC]	--
k_bacteria.p__Firmicutes.c__Bacilli.o__Haloplasmatales.f__Turicibacteraceae.g__Turicibacter	2.89 (1.56)	4.93 (1.29)	4.52 (1.33)	2.95e-10	2.04 [1.33, 2.76]***	1.63 [0.885, 2.38]***	-0.411 [-1.21, 0.39]	3.71*** [Kennel]	3.86*** [UIUC]	--
k_bacteria.p__Firmicutes.c__Bacilli.o__Haloplasmatales.f__Turicibacteraceae.g__Turicibacter.s__	1.13 (1.23)	3.12 (1.1)	2.36 (1.1)	1.48e-12	1.99 [1.41, 2.57]***	1.23 [0.627, 1.84]***	-0.755 [-1.4, -0.107]*	2.69*** [Kennel]	2.14*** [UIUC]	--
k_bacteria.p__Firmicutes.c__Bacilli.o__Haloplasmatales.f__Turicibacteraceae.g__Turicibacter.s__Turicibacter_sanguinis	1.66 (1.48)	4.15 (1.19)	3.81 (1.67)	7.85e-15	2.49 [1.79, 3.19]***	2.15 [1.42, 2.88]***	-0.341 [-1.12, 0.443]	3.36*** [Kennel]	3.69*** [UIUC]	--
k_bacteria.p__Firmicutes.c__Bacilli.o__Haloplasmatales.f__Turicibacteraceae.g__Turicibacter.s__Turicibacter_sp001543345	2.58 (1.52)	4.36 (1.04)	4.14 (1.62)	4.31e-09	1.78 [1.08, 2.47]***	1.56 [0.835, 2.28]***	-0.218 [-0.993, 0.557]	3.44*** [Kennel]	3.37*** [UIUC]	--
k_bacteria.p__Firmicutes.c__Bacilli.o__Lactobacillales.f__	3.95 (1.57)	4.03 (1.43)	2.98 (1.59)	0.00466	0.0861 [-0.66, 0.832]	-0.966 [-1.74, -0.188]*	-1.05 [-1.88, -0.218]**	--	2.57* [Pet]	--
k_bacteria.p__Firmicutes.c__Bacilli.o__Lactobacillales.f__.g__	3.58 (1.38)	4.23 (1.03)	2.64 (1.34)	1.8e-06	0.652 [0.031, 1.27]*	-0.933 [-1.58, -0.286]**	-1.59 [-2.28, -0.892]***	2.38* [Kennel]	2.57* [Pet]	2.61*** [Kennel]
k_bacteria.p__Firmicutes.c__Bacilli.o__Lactobacillales.f__.g__.s__	3.34 (1.3)	3.95 (1.04)	2.7 (1.26)	0.000112	0.614 [0.0126, 1.21]*	-0.639 [-1.26, -0.0124]*	-1.25 [-1.92, -0.581]***	2.38* [Kennel]	2.57* [Pet]	2.61*** [Kennel]
k_bacteria.p__Firmicutes.c__Bacilli.o__Lactobacillales.f__Enterococcaceae	5.69 (1.67)	4.69 (1.37)	4.58 (1.52)	0.000742	-0.995 [-1.74, -0.25]**	-1.1 [-1.88, -0.328]**	-0.109 [-0.941, 0.723]	4.51*** [Pet]	4.25** [Pet]	--
k_bacteria.p__Firmicutes.c__Bacilli.o__Lactobacillales.f__Enterococcaceae.g__	3.62 (1.42)	3.2 (1.23)	2.25 (1.45)	2.07e-05	-0.423 [-1.07, 0.224]	-1.37 [-2.05, -0.7]***	-0.951 [-1.67, -0.229]**	--	2.88*** [Pet]	--
k_bacteria.p__Firmicutes.c__Bacilli.o__Lactobacillales.f__Enterococcaceae.g__.s__	3.44 (1.26)	3.02 (1.38)	2.19 (1.22)	5.1e-05	-0.419 [-1.04, 0.2]	-1.26 [-1.9, -0.613]***	-0.839 [-1.53, -0.147]*	--	2.88*** [Pet]	--
k_bacteria.p__Firmicutes.c__Bacilli.o__Lactobacillales.f__Enterococcaceae.g__Enterococcus	3.62 (2.42)	1.32 (1.2)	2.43 (2.26)	2.66e-07	-2.3 [-3.23, -1.36]***	-1.19 [-2.16, -0.213]*	1.11 [0.0675, 2.15]*	4.13*** [Pet]	--	4.39** [UIUC]
k_bacteria.p__Firmicutes.c__Bacilli.o__Lactobacillales.f__Enterococcaceae.g__Enterococcus_A	3.57 (1.9)	2.74 (1.33)	1.74 (1.39)	4.13e-06	-0.825 [-1.62, -0.0268]*	-1.83 [-2.67, -1]***	-1.01 [-1.9, -0.117]*	--	3.86*** [Pet]	2.35** [UIUC]
k_bacteria.p__Firmicutes.c__Bacilli.o__Lactobacillales.f__Enterococcaceae.g__Enterococcus_A.s__	1.72 (1.55)	0 (0)	0.428 (0.889)	9.9e-12	-1.72 [-2.26, -1.17]***	-1.29 [-1.85, -0.721]***	0.428 [-0.178, 1.03]	2.30*** [Pet]	--	3.92** [UIUC]
k_bacteria.p__Firmicutes.c__Bacilli.o__Lactobacillales.f__Enterococcaceae.g__Enterococcus_A.s__Enterococcus_A_avium	2.74 (2.35)	0.426 (0.838)	0.959 (1.42)	6.02e-09	-2.31 [-3.19, -1.44]***	-1.78 [-2.69, -0.867]***	0.533 [-0.447, 1.51]	3.84*** [Pet]	3.85*** [Pet]	--
k_bacteria.p__Firmicutes.c__Bacilli.o__Lactobacillales.f__Enterococcaceae.g__Enterococcus_A.s__Enterococcus_A_hermanniensis	0.889 (1.34)	2.15 (1.71)	0.475 (0.814)	2.35e-07	1.26 [0.618, 1.91]***	-0.414 [-1.09, 0.26]	-1.68 [-2.4, -0.956]***	2.71*** [Kennel]	--	2.63*** [Kennel]
k_bacteria.p__Firmicutes.c__Bacilli.o__Lactobacillales.f__Enterococcaceae.g__Enterococcus_B	4.52 (1.51)	4.15 (1.14)	2.98 (1.07)	1.74e-06	-0.369 [-1.02, 0.282]	-1.54 [-2.21, -0.857]***	-1.17 [-1.89, -0.439]***	--	4.03*** [Pet]	--
k_bacteria.p__Firmicutes.c__Bacilli.o__Lactobacillales.f__Enterococcaceae.g__Enterococcus_B.s__	3.23 (1.55)	2.32 (1.1)	1.27 (1.27)	4.36e-09	-0.907 [-1.57, -0.242]**	-1.96 [-2.65, -1.27]***	-1.05 [-1.79, -0.309]**	3.26*** [Pet]	3.35*** [Pet]	2.46* [Kennel]
k_bacteria.p__Firmicutes.c__Bacilli.o__Lactobacillales.f__Enterococcaceae.g__Enterococcus_B.s__Enterococcus_B_faecium	3.67 (1.42)	3.17 (1.25)	2.05 (1.4)	2.42e-06	-0.501 [-1.19, 0.188]	-1.62 [-2.34, -0.9]***	-1.12 [-1.89, -0.348]**	--	3.73*** [Pet]	--
k_bacteria.p__Firmicutes.c__Bacilli.o__Lactobacillales.f__Enterococcaceae.g__Enterococcus_B.s__Enterococcus_B_faecium_B	3.95 (1.44)	3.18 (1)	2.42 (1.16)	8.18e-07	-0.762 [-1.38, -0.139]*	-1.52 [-2.17, -0.874]***	-0.761 [-1.46, -0.0659]*	3.24* [Pet]	3.34*** [Pet]	2.37** [Kennel]
k_bacteria.p__Firmicutes.c__Bacilli.o__Lactobacillales.f__Enterococcaceae.g__Enterococcus_B.s__Enterococcus_B_hirae	3.29 (1.6)	2.79 (0.941)	1.48 (1.63)	1.95e-07	-0.504 [-1.21, 0.199]	-1.82 [-2.55, -1.09]***	-1.31 [-2.1, -0.529]***	--	2.99*** [Pet]	--
k_bacteria.p__Firmicutes.c__Bacilli.o__Lactobacillales.f__Enterococcaceae.g__Enterococcus_C	3.5 (1.73)	2.36 (1.35)	1.54 (1.56)	1.52e-07	-1.15 [-1.91, -0.379]**	-1.96 [-2.76, -1.17]***	-0.82 [-1.67, 0.0354]	3.12*** [Pet]	2.68*** [Pet]	--
k_bacteria.p__Firmicutes.c__Bacilli.o__Lactobacillales.f__Enterococcaceae.g__Enterococcus_C.s__Enterococcus_C_canintestini	3.14 (1.55)	1.21 (0.934)	1.57 (1.94)	8.07e-10	-1.93 [-2.63, -1.23]***	-1.57 [-2.29, -0.837]***	0.363 [-0.418, 1.14]	3.12*** [Pet]	2.68*** [Pet]	--
k_bacteria.p__Firmicutes.c__Bacilli.o__Lactobacillales.f__Enterococcaceae.g__Enterococcus_D	3.18 (2.09)	1.16 (1.14)	1.87 (1.83)	8.53e-07	-2.01 [-2.89, -1.14]***	-1.31 [-2.22, -0.396]**	0.705 [-0.275, 1.68]	3.36*** [Pet]	4.01** [UIUC]	--
k_bacteria.p__Firmicutes.c__Bacilli.o__Lactobacillales.f__Enterococcaceae.g__Enterococcus_D.s__	2.06 (1.98)	0.264 (0.614)	1.29 (1.93)	2.15e-06	-1.8 [-2.59, -1.01]***	-0.776 [-1.6, 0.0483]	1.02 [0.14, 1.91]*	2.80*** [Pet]	--	3.44* [UIUC]
k_bacteria.p__Firmicutes.c__Bacilli.o__Lactobacillales.f__Enterococcaceae.g__Enterococcus_D.s__Enterococcus_D_casseliflavus	2.19 (1.91)	0.36 (0.751)	1.1 (1.81)	5.87e-07	-1.83 [-2.61, -1.05]***	-1.09 [-1.9, -0.283]**	0.739 [-0.128, 1.61]	3.21*** [Pet]	3.75** [UIUC]	3.58* [UIUC]
k_bacteria.p__Firmicutes.c__Bacilli.o__Lactobacillales.f__Enterococcaceae.g__Enterococcus_D.s__Enterococcus_D_sp002850555	1.34 (1.47)	0.151 (0.487)	0.825 (1.44)	2.31e-05	-1.19 [-1.78, -0.606]***	-0.518 [-1.13, 0.0912]	0.673 [0.0198, 1.33]*	2.42*** [Pet]	--	2.90* [UIUC]
k_bacteria.p__Firmicutes.c__Bacilli.o__Lactobacillales.f__Enterococcaceae.g__Enterococcus_E	0.986 (1.18)	3.58 (1.8)	1.59 (1.91)	3.09e-13	2.6 [1.87, 3.33]***	0.609 [-0.153, 1.37]	-1.99 [-2.81, -1.17]***	3.07*** [Kennel]	--	2.90*** [Kennel]
k_bacteria.p__Firmicutes.c__Bacilli.o__Lactobacillales.f__Enterococcaceae.g__Enterococcus_E.s__Enterococcus_E_cecorum	0.795 (0.936)	3.65 (1.81)	1.51 (1.86)	6.95e-17	2.86 [2.18, 3.54]***	0.719 [0.012, 1.43]*	-2.14 [-2.9, -1.38]***	3.07*** [Kennel]	--	2.90*** [Kennel]
k_bacteria.p__Firmicutes.c__Bacilli.o__Lactobacillales.f__Enterococcaceae.g__Enterococcus_H	1.96 (1.95)	0.136 (0.486)	0.558 (1.31)	2.67e-08	-1.82 [-2.55, -1.1]***	-1.4 [-2.15, -0.645]***	0.422 [-0.386, 1.23]	3.03*** [Pet]	3.08*** [Pet]	--
k_bacteria.p__Firmicutes.c__Bacilli.o__Lactobacillales.f__Enterococcaceae.g__Enterococcus_H.s__Enterococcus_H_canis	1.72 (1.71)	0.166 (0.593)	0.446 (1.09)	4.18e-08	-1.56 [-2.2, -0.917]***	-1.28 [-1.94, -0.611]***	0.28 [-0.435, 0.994]	3.03*** [Pet]	3.08*** [Pet]	--
k_bacteria.p__Firmicutes.c__Bacilli.o__Lactobacillales.f__Enterococcaceae.g__Enterococcus.s__Enterococcus_faecalis	3.57 (2.34)	1.28 (1.17)	2.28 (2.28)	2.51e-07	-2.28 [-3.22, -1.35]***	-1.29 [-2.26, -0.315]**	0.997 [-0.0441, 2.04]	4.13*** [Pet]	--	4.39** [UIUC]
k_bacteria.p__Firmicutes.c__Bacilli.o__Lactobacillales.f__Lactobacillaceae	3.22 (1.87)	5.82 (1.75)	5.1 (2.05)	9.06e-10	2.6 [1.68, 3.52]***	1.88 [0.926, 2.84]***	-0.719 [-1.75, 0.308]	4.89*** [Kennel]	4.48*** [UIUC]	--
k_bacteria.p__Firmicutes.c__Bacilli.o__Lactobacillales.f__Lactobacillaceae.g__	1.81 (1.96)	4.02 (1.61)	3.12 (1.87)	1.5e-07	2.21 [1.32, 3.09]***	1.31 [0.385, 2.24]**	-0.895 [-1.89, 0.0968]	3.39*** [Kennel]	3.02*** [UIUC]	3.19* [Kennel]
k_bacteria.p__Firmicutes.c__Bacilli.o__Lactobacillales.f__Lactobacillaceae.g__.s__	1.73 (1.8)	4.01 (1.63)	2.74 (1.97)	3.31e-08	2.29 [1.43, 3.14]***	1.01 [0.114, 1.9]*	-1.28 [-2.24, -0.317]**	3.39*** [Kennel]	3.02*** [UIUC]	3.19* [Kennel]
k_bacteria.p__Firmicutes.c__Bacilli.o__Lactobacillales.f__Lactobacillaceae.g__Lactobacillus	2.01 (1.72)	4.13 (1.75)	3.49 (2.3)	3.92e-07	2.12 [1.22, 3.03]***	1.48 [0.534, 2.43]***	-0.644 [-1.66, 0.37]	4.41*** [Kennel]	4.01*** [UIUC]	--
k_bacteria.p__Firmicutes.c__Bacilli.o__Lactobacillales.f__Lactobacillaceae.g__Lactobacillus.s__	0.737 (1.41)	3.05 (2.01)	2.1 (1.85)	2.43e-09	2.31 [1.5, 3.13]***	1.36 [0.512, 2.21]***	-0.954 [-1.86, -0.0455]*	3.10*** [Kennel]	2.69*** [UIUC]	--
k_bacteria.p__Firmicutes.c__Bacilli.o__Lactobacillales.f__Lactobacillaceae.g__Lactobacillus.s__Lactobacillus_acidophilus	1.47 (1.52)	3.92 (1.79)	2.51 (2.09)	1.19e-09	2.46 [1.62, 3.29]***	1.05 [0.177, 1.91]*	-1.41 [-2.34, -0.48]**	4.26*** [Kennel]	3.68** [UIUC]	4.18** [Kennel]
k_bacteria.p__Firmicutes.c__Bacilli.o__Lactobacillales.f__Lactobacillaceae.g__Lactobacillus.s__Lactobacillus_amylovorus	0.565 (1.1)	2.22 (1.81)	1.86 (1.85)	1.59e-07	1.66 [0.954, 2.36]***	1.3 [0.563, 2.03]***	-0.361 [-1.15, 0.425]	2.64*** [Kennel]	2.25*** [UIUC]	--
k_bacteria.p__Firmicutes.c__Bacilli.o__Lactobacillales.f__Lactobacillaceae.g__Lactobacillus.s__Lactobacillus_crispatus	0.485 (0.892)	1.88 (1.7)	1.1 (1.46)	4.37e-06	1.4 [0.764, 2.03]***	0.617 [-0.0432, 1.28]	-0.78 [-1.49, -0.0724]*	2.54*** [Kennel]	--	2.38* [Kennel]
k_bacteria.p__Firmicutes.c__Bacilli.o__Lactobacillales.f__Lactobacillaceae.g__Lactobacillus.s__Lactobacillus_helveticus	0.412 (0.953)	1.97 (1.85)	1.46 (1.69)	8.12e-07	1.56 [0.88, 2.24]***	1.05 [0.338, 1.76]**	-0.514 [-1.28, 0.248]	2.38*** [Kennel]	2.09*** [UIUC]	--
k_bacteria.p__Firmicutes.c__Bacilli.o__Lactobacillales.f__Lactobacillaceae.g__Lactobacillus.s__Lactobacillus_johnsonii	0.699 (1.6)	3.64 (2.03)	2.22 (2.4)	9.24e-11	2.94 [2, 3.87]***	1.52 [0.549, 2.5]***	-1.42 [-2.46, -0.372]**	3.74*** [Kennel]	3.68*** [UIUC]	3.60** [UIUC]
k_bacteria.p__Firmicutes.c__Bacilli.o__Lactobacillales.f__Lactobacillaceae.g__Lactobacillus.s__Lactobacillus_taiwanensis	0.43 (1.2)	1.95 (1.85)	1.17 (1.78)	2.89e-05	1.52 [0.764, 2.28]***	0.737 [-0.0517, 1.53]	-0.784 [-1.63, 0.0619]	2.32*** [Kennel]	--	--
k_bacteria.p__Firmicutes.c__Bacilli.o__Lactobacillales.f__Lactobacillaceae.g__Ligilactobacillus	1.65 (1.78)	4.94 (1.63)	3.43 (2.19)	4.06e-14	3.29 [2.42, 4.17]***	1.78 [0.863, 2.69]***	-1.52 [-2.5, -0.535]**	4.51*** [Kennel]	4.19*** [UIUC]	4.30** [Kennel]
k_bacteria.p__Firmicutes.c__Bacilli.o__Lactobacillales.f__Lactobacillaceae.g__Ligilactobacillus.s__	0.361 (0.985)	3.59 (1.82)	1.86 (1.9)	1.48e-18	3.23 [2.52, 3.94]***	1.5 [0.761, 2.23]***	-1.73 [-2.52, -0.94]***	2.97*** [Kennel]	2.67*** [UIUC]	2.75** [Kennel]
k_bacteria.p__Firmicutes.c__Bacilli.o__Lactobacillales.f__Lactobacillaceae.g__Ligilactobacillus.s__Ligilactobacillus_animalis	0.696 (1.8)	5.21 (1.5)	2.9 (2.35)	4.81e-21	4.51 [3.61, 5.42]***	2.21 [1.26, 3.15]***	-2.31 [-3.32, -1.3]***	4.48*** [Kennel]	4.18*** [UIUC]	4.26** [Kennel]
k_bacteria.p__Firmicutes.c__Bacilli.o__Lactobacillales.f__Lactobacillaceae.g__Ligilactobacillus.s__Ligilactobacillus_murinus	0.454 (1.21)	2.85 (1.87)	1.52 (1.87)	9.81e-11	2.39 [1.63, 3.15]***	1.07 [0.278, 1.86]**	-1.33 [-2.17, -0.478]***	2.29*** [Kennel]	--	2.15** [Kennel]
k_bacteria.p__Firmicutes.c__Bacilli.o__Lactobacillales.f__Lactobacillaceae.g__Ligilactobacillus.s__Ligilactobacillus_ruminis	0.157 (0.552)	2.29 (2.15)	0.206 (0.444)	1.52e-16	2.13 [1.59, 2.68]***	0.0485 [-0.523, 0.62]	-2.09 [-2.7, -1.47]***	3.24*** [Kennel]	--	3.21*** [Kennel]
k_bacteria.p__Firmicutes.c__Bacilli.o__Lactobacillales.f__Lactobacillaceae.g__Ligilactobacillus.s__Ligilactobacillus_saerimneri	0.128 (0.544)	1.5 (1.58)	0.383 (0.851)	1.44e-10	1.37 [0.921, 1.83]***	0.256 [-0.215, 0.727]	-1.12 [-1.62, -0.612]***	2.39*** [Kennel]	--	2.43*** [Kennel]
k_bacteria.p__Firmicutes.c__Bacilli.o__Lactobacillales.f__Lactobacillaceae.g__Ligilactobacillus.s__Ligilactobacillus_salivarius	0.906 (1.23)	2.99 (1.54)	1.13 (1.32)	1.48e-12	2.09 [1.46, 2.72]***	0.219 [-0.435, 0.874]	-1.87 [-2.57, -1.17]***	2.43*** [Kennel]	--	2.33*** [Kennel]
k_bacteria.p__Firmicutes.c__Bacilli.o__Lactobacillales.f__Lactobacillaceae.g__Limosilactobacillus	1.7 (1.75)	4.11 (1.98)	3.31 (2.06)	2.12e-08	2.41 [1.49, 3.33]***	1.62 [0.655, 2.58]***	-0.795 [-1.83, 0.237]	4.23*** [Kennel]	3.63*** [UIUC]	4.13** [Kennel]
k_bacteria.p__Firmicutes.c__Bacilli.o__Lactobacillales.f__Lactobacillaceae.g__Limosilactobacillus.s__	0.656 (1.42)	2.18 (1.86)	1.02 (1.41)	1.68e-05	1.52 [0.773, 2.27]***	0.365 [-0.414, 1.14]	-1.16 [-1.99, -0.321]**	2.30*** [Kennel]	--	2.31* [Kennel]
k_bacteria.p__Firmicutes.c__Bacilli.o__Lactobacillales.f__Lactobacillaceae.g__Limosilactobacillus.s__Limosilactobacillus_reuteri	1.22 (1.92)	4.04 (1.75)	2.76 (2.16)	5.32e-10	2.82 [1.88, 3.77]***	1.54 [0.556, 2.52]***	-1.28 [-2.34, -0.23]*	4.23*** [Kennel]	3.63*** [UIUC]	4.12** [Kennel]
k_bacteria.p__Firmicutes.c__Bacilli.o__Lactobacillales.f__Lactobacillaceae.g__Pediococcus	0.949 (1.31)	2.05 (1.38)	1.46 (1.59)	0.00079	1.1 [0.43, 1.78]***	0.515 [-0.186, 1.22]	-0.589 [-1.34, 0.163]	2.63*** [Kennel]	--	2.55** [Kennel]
k_bacteria.p__Firmicutes.c__Bacilli.o__Lactobacillales.f__Lactobacillaceae.g__Pediococcus.s__Pediococcus_acidilactici	0.819 (1.3)	1.91 (1.32)	1.46 (1.54)	0.000493	1.09 [0.438, 1.74]***	0.643 [-0.036, 1.32]	-0.446 [-1.17, 0.282]	2.63*** [Kennel]	--	2.53** [Kennel]
k_bacteria.p__Firmicutes.c__Bacilli.o__Lactobacillales.f__Streptococcaceae	5.21 (1.87)	5.6 (1.53)	4.01 (1.35)	0.000202	0.392 [-0.431, 1.21]	-1.2 [-2.06, -0.342]**	-1.59 [-2.51, -0.672]***	--	4.57** [Pet]	--
k_bacteria.p__Firmicutes.c__Bacilli.o__Lactobacillales.f__Streptococcaceae.g__	1.84 (1.66)	2.11 (1.27)	1.15 (1.54)	0.0239	0.276 [-0.479, 1.03]	-0.684 [-1.47, 0.102]	-0.96 [-1.8, -0.117]*	--	--	--
k_bacteria.p__Firmicutes.c__Bacilli.o__Lactobacillales.f__Streptococcaceae.g__.s__	1.62 (1.53)	2.07 (1.25)	1.04 (1.26)	0.0068	0.451 [-0.232, 1.13]	-0.585 [-1.3, 0.127]	-1.04 [-1.8, -0.273]**	--	--	--
k_bacteria.p__Firmicutes.c__Bacilli.o__Lactobacillales.f__Streptococcaceae.g__Lactococcus	2.63 (1.43)	2.29 (1.16)	1.64 (1.46)	0.00248	-0.335 [-0.97, 0.299]	-0.988 [-1.65, -0.327]**	-0.653 [-1.36, 0.0558]	--	2.07*** [Pet]	--
k_bacteria.p__Firmicutes.c__Bacilli.o__Lactobacillales.f__Streptococcaceae.g__Streptococcus	4.93 (1.81)	5.14 (1.21)	4.03 (1.42)	0.00618	0.205 [-0.562, 0.973]	-0.899 [-1.7, -0.0998]*	-1.1 [-1.96, -0.248]**	--	4.57** [Pet]	--
k_bacteria.p__Firmicutes.c__Bacilli.o__Lactobacillales.f__Streptococcaceae.g__Streptococcus.s__	3.85 (1.98)	4.54 (1.44)	2.8 (1.61)	0.0002	0.693 [-0.179, 1.56]	-1.05 [-1.96, -0.146]*	-1.75 [-2.72, -0.774]***	--	4.00** [Pet]	--
k_bacteria.p__Firmicutes.c__Bacilli.o__Lactobacillales.f__Streptococcaceae.g__Streptococcus.s__Streptococcus_equinus	1.91 (1.68)	3.31 (1.36)	0.709 (1.29)	9.64e-11	1.4 [0.66, 2.14]***	-1.2 [-1.97, -0.428]***	-2.6 [-3.43, -1.77]***	2.19*** [Kennel]	--	2.27*** [Kennel]
k_bacteria.p__Firmicutes.c__Bacilli.o__Lactobacillales.f__Streptococcaceae.g__Streptococcus.s__Streptococcus_equinus_B	1.51 (1.55)	2.59 (1.52)	0.512 (1.02)	3.08e-08	1.08 [0.38, 1.78]**	-1 [-1.73, -0.271]**	-2.08 [-2.86, -1.3]***	2.43** [Kennel]	--	2.38*** [Kennel]
k_bacteria.p__Firmicutes.c__Bacilli.o__Lactobacillales.f__Streptococcaceae.g__Streptococcus.s__Streptococcus_gallolyticus	2.54 (2.14)	3.21 (1.29)	0.924 (1.31)	2.46e-07	0.669 [-0.177, 1.51]	-1.61 [-2.49, -0.733]***	-2.28 [-3.23, -1.34]***	--	3.85*** [Pet]	--
k_bacteria.p__Firmicutes.c__Bacilli.o__Lactobacillales.f__Streptococcaceae.g__Streptococcus.s__Streptococcus_infantarius	1.93 (1.55)	3.15 (1.26)	0.877 (1.32)	8.28e-10	1.22 [0.536, 1.91]***	-1.05 [-1.77, -0.337]**	-2.28 [-3.05, -1.51]***	2.17*** [Kennel]	--	2.21*** [Kennel]
k_bacteria.p__Firmicutes.c__Bacilli.o__Lactobacillales.f__Streptococcaceae.g__Streptococcus.s__Streptococcus_lutetiensis	4 (1.99)	5.05 (1.41)	2.96 (1.46)	4.6e-06	1.05 [0.198, 1.9]*	-1.04 [-1.93, -0.153]*	-2.09 [-3.04, -1.14]***	3.93*** [Pet]	--	4.08*** [Kennel]
k_bacteria.p__Firmicutes.c__Bacilli.o__Lactobacillales.f__Streptococcaceae.g__Streptococcus.s__Streptococcus_macedonicus	2.34 (1.61)	3.03 (1.32)	1.07 (1.33)	2.68e-07	0.69 [-0.0298, 1.41]	-1.27 [-2.02, -0.524]***	-1.96 [-2.77, -1.16]***	--	--	--
k_bacteria.p__Firmicutes.c__Bacilli.o__Lactobacillales.f__Streptococcaceae.g__Streptococcus.s__Streptococcus_minor	2.9 (1.23)	2.32 (1.18)	1.18 (0.972)	3.4e-09	-0.579 [-1.16, 0.000513]	-1.72 [-2.33, -1.12]***	-1.14 [-1.79, -0.497]***	--	2.31*** [Pet]	--
k_bacteria.p__Firmicutes.c__Bacilli.o__Lactobacillales.f__Streptococcaceae.g__Streptococcus.s__Streptococcus_pasteurianus	3.19 (1.7)	2.84 (1.07)	1.63 (1.36)	9.36e-06	-0.345 [-1.06, 0.366]	-1.55 [-2.29, -0.81]***	-1.21 [-2, -0.411]**	--	3.43*** [Pet]	--
k_bacteria.p__Firmicutes.c__Bacilli.o__Lactobacillales.f__Streptococcaceae.g__Streptococcus.s__Streptococcus_thermophilus	2.21 (1.54)	2.32 (1.12)	1.36 (1.15)	0.00375	0.118 [-0.536, 0.771]	-0.842 [-1.52, -0.161]*	-0.96 [-1.69, -0.23]**	--	2.27*** [Pet]	--
k_bacteria.p__Firmicutes.c__Erysipelotrichia	1.68 (2.33)	3.7 (1.79)	1.54 (1.97)	2.01e-06	2.02 [1.03, 3.02]***	-0.139 [-1.18, 0.898]	-2.16 [-3.27, -1.05]***	2.70*** [Kennel]	--	2.88*** [Kennel]
k_bacteria.p__Firmicutes.c__Erysipelotrichia.o__Erysipelotrichales	1.6 (2.13)	3.57 (1.62)	1.45 (1.66)	3.78e-07	1.97 [1.06, 2.88]***	-0.151 [-1.1, 0.797]	-2.12 [-3.14, -1.1]***	2.70*** [Kennel]	--	2.88*** [Kennel]
k_bacteria.p__Firmicutes.c__Erysipelotrichia.o__Erysipelotrichales.f__Erysipelotrichaceae	1.61 (2.17)	3.61 (1.72)	1.64 (1.87)	7.24e-07	2 [1.09, 2.92]***	0.0336 [-0.918, 0.986]	-1.97 [-2.99, -0.948]***	2.70*** [Kennel]	--	2.88*** [Kennel]
k_bacteria.p__Firmicutes.c__Erysipelotrichia.o__Erysipelotrichales.f__Erysipelotrichaceae.g__Catenibacterium	1.49 (2.04)	3.33 (1.57)	1.49 (1.62)	7.34e-07	1.84 [0.998, 2.69]***	0.0091 [-0.872, 0.89]	-1.83 [-2.78, -0.89]***	2.70*** [Kennel]	--	2.88*** [Kennel]
k_bacteria.p__Firmicutes.c__Erysipelotrichia.o__Erysipelotrichales.f__Erysipelotrichaceae.g__Catenibacterium.s__Catenibacterium_mitsuokai	1.42 (1.96)	3.12 (1.55)	1.37 (1.53)	5.25e-07	1.7 [0.922, 2.48]***	-0.041 [-0.852, 0.77]	-1.74 [-2.61, -0.872]***	2.69*** [Kennel]	--	2.88*** [Kennel]
k_bacteria.p__Fusobacteriota	3.18 (1.62)	4.14 (1.65)	3.13 (1.52)	0.00807	0.953 [0.155, 1.75]*	-0.0528 [-0.884, 0.778]	-1.01 [-1.9, -0.115]*	3.47*** [Kennel]	--	3.59*** [Kennel]
k_bacteria.p__Fusobacteriota.c__Fusobacteriia	3.72 (1.88)	4.67 (1.73)	3.65 (1.58)	0.0184	0.948 [0.0667, 1.83]*	-0.0702 [-0.988, 0.848]	-1.02 [-2, -0.0342]*	3.47*** [Kennel]	--	3.59*** [Kennel]
k_bacteria.p__Fusobacteriota.c__Fusobacteriia.o__Fusobacteriales	3.56 (1.74)	4.59 (1.81)	3.73 (1.42)	0.0114	1.02 [0.199, 1.85]*	0.168 [-0.692, 1.03]	-0.856 [-1.78, 0.0661]	3.47*** [Kennel]	--	3.59*** [Kennel]
k_bacteria.p__Fusobacteriota.c__Fusobacteriia.o__Fusobacteriales.f__Fusobacteriaceae	3.2 (1.87)	4.72 (1.43)	3.69 (1.39)	7e-05	1.52 [0.723, 2.32]***	0.486 [-0.344, 1.32]	-1.03 [-1.92, -0.145]*	3.47*** [Kennel]	--	3.59*** [Kennel]
k_bacteria.p__Fusobacteriota.c__Fusobacteriia.o__Fusobacteriales.f__Fusobacteriaceae.g__Fusobacterium_A	3.06 (1.81)	4.19 (1.32)	3.65 (1.24)	0.00257	1.13 [0.368, 1.89]**	0.586 [-0.206, 1.38]	-0.543 [-1.39, 0.306]	3.47*** [Kennel]	--	3.58*** [Kennel]
k_bacteria.p__Fusobacteriota.c__Fusobacteriia.o__Fusobacteriales.f__Fusobacteriaceae.g__Fusobacterium_A.s__Fusobacterium_A_sp900543175	2.74 (1.8)	4.12 (0.963)	3.55 (1.24)	4.46e-05	1.38 [0.668, 2.1]***	0.816 [0.072, 1.56]*	-0.567 [-1.36, 0.23]	3.47*** [Kennel]	2.88* [Pet]	3.58*** [Kennel]
k_bacteria.p__Fusobacteriota.c__Fusobacteriia.o__Fusobacteriales.f__Fusobacteriaceae.g__Fusobacterium_B	1.35 (1.49)	2.65 (1.39)	2.26 (1.12)	2.76e-05	1.29 [0.626, 1.96]***	0.906 [0.209, 1.6]**	-0.389 [-1.14, 0.358]	2.51*** [Kennel]	2.38** [Pet]	2.38** [Kennel]
k_bacteria.p__Fusobacteriota.c__Fusobacteriia.o__Fusobacteriales.f__Fusobacteriaceae.g__Fusobacterium_B.s__Fusobacterium_B_sp900541465	1.21 (1.3)	2.82 (1.27)	1.97 (1.17)	3.51e-08	1.62 [1.01, 2.23]***	0.763 [0.127, 1.4]*	-0.854 [-1.53, -0.173]**	2.51*** [Kennel]	2.37** [Pet]	2.38** [Kennel]
k_bacteria.p__Proteobacteria	6.03 (1.68)	4.59 (1.47)	5.17 (1.82)	0.00016	-1.45 [-2.25, -0.641]***	-0.866 [-1.7, -0.0263]*	0.581 [-0.318, 1.48]	5.23*** [Pet]	--	4.91** [UIUC]
k_bacteria.p__Proteobacteria.c__Gammaproteobacteria	6.55 (1.89)	5.12 (1.96)	5.64 (1.99)	0.00165	-1.43 [-2.38, -0.483]**	-0.913 [-1.9, 0.0725]	0.515 [-0.541, 1.57]	5.23*** [Pet]	--	4.91** [UIUC]
k_bacteria.p__Proteobacteria.c__Gammaproteobacteria.o__.f__.g__	2.9 (1.62)	1.95 (1.29)	3.01 (0.959)	0.00118	-0.947 [-1.63, -0.263]**	0.115 [-0.598, 0.828]	1.06 [0.298, 1.83]**	2.11** [Pet]	--	2.28*** [Kennel]
k_bacteria.p__Proteobacteria.c__Gammaproteobacteria.o__Burkholderiales	2.34 (1.97)	3.56 (1.51)	3.57 (1.44)	0.000327	1.22 [0.399, 2.04]**	1.23 [0.375, 2.09]**	0.0105 [-0.908, 0.929]	2.75*** [Kennel]	2.71*** [UIUC]	--
k_bacteria.p__Proteobacteria.c__Gammaproteobacteria.o__Burkholderiales.f__Burkholderiaceae	2.4 (1.91)	3.82 (1.81)	3.7 (1.71)	0.000198	1.42 [0.533, 2.3]***	1.3 [0.373, 2.22]**	-0.123 [-1.11, 0.867]	2.75*** [Kennel]	2.71*** [UIUC]	--
k_bacteria.p__Proteobacteria.c__Gammaproteobacteria.o__Burkholderiales.f__Burkholderiaceae.g__Parasutterella	0.143 (0.621)	2.09 (2.04)	2.5 (2.05)	1.39e-12	1.95 [1.22, 2.67]***	2.36 [1.6, 3.11]***	0.41 [-0.396, 1.22]	2.79*** [Kennel]	2.78*** [UIUC]	--
k_bacteria.p__Proteobacteria.c__Gammaproteobacteria.o__Burkholderiales.f__Burkholderiaceae.g__Parasutterella.s__Parasutterella_excrementihominis	0.142 (0.606)	2.33 (2.25)	2.19 (1.91)	8.54e-13	2.19 [1.48, 2.89]***	2.05 [1.32, 2.78]***	-0.137 [-0.923, 0.648]	2.79*** [Kennel]	2.78*** [UIUC]	--
k_bacteria.p__Proteobacteria.c__Gammaproteobacteria.o__Burkholderiales.f__Burkholderiaceae.g__Sutterella.s__	1.16 (1.62)	2.61 (1.3)	1.57 (1.38)	1.52e-05	1.45 [0.746, 2.15]***	0.409 [-0.325, 1.14]	-1.04 [-1.83, -0.255]**	2.25*** [Pet]	--	--
k_bacteria.p__Proteobacteria.c__Gammaproteobacteria.o__Burkholderiales.f__Burkholderiaceae.g__Sutterella.s__Sutterella_wadsworthensis_A	1.63 (1.58)	2.55 (1.56)	1.56 (1.32)	0.00187	0.918 [0.243, 1.59]**	-0.0704 [-0.774, 0.633]	-0.989 [-1.74, -0.235]**	2.27** [Pet]	--	2.58* [Kennel]
k_bacteria.p__Proteobacteria.c__Gammaproteobacteria.o__Enterobacterales	6.27 (1.98)	4.7 (1.44)	5.23 (2)	0.000167	-1.57 [-2.45, -0.679]***	-1.04 [-1.96, -0.116]*	0.526 [-0.464, 1.52]	5.23*** [Pet]	4.96* [Pet]	--
k_bacteria.p__Proteobacteria.c__Gammaproteobacteria.o__Enterobacterales.f__	2.54 (1.87)	1.02 (1.2)	1.47 (1.38)	1.84e-05	-1.53 [-2.3, -0.753]***	-1.07 [-1.88, -0.267]**	0.454 [-0.409, 1.32]	2.21*** [Pet]	2.02** [Pet]	--
k_bacteria.p__Proteobacteria.c__Gammaproteobacteria.o__Enterobacterales.f__.g__	2.16 (1.66)	0.95 (1.14)	1.32 (1.3)	0.000167	-1.21 [-1.9, -0.52]***	-0.841 [-1.56, -0.12]*	0.371 [-0.401, 1.14]	2.21*** [Pet]	2.02** [Pet]	--
k_bacteria.p__Proteobacteria.c__Gammaproteobacteria.o__Enterobacterales.f__.g__.s__	2.23 (1.78)	0.961 (1)	1.1 (1.13)	2.96e-05	-1.26 [-1.96, -0.564]***	-1.12 [-1.85, -0.391]**	0.144 [-0.638, 0.926]	2.21*** [Pet]	2.02** [Pet]	--
k_bacteria.p__Proteobacteria.c__Gammaproteobacteria.o__Enterobacterales.f__Enterobacteriaceae	6.4 (2.06)	4.49 (1.46)	5.43 (2.12)	1.56e-05	-1.91 [-2.83, -0.987]***	-0.969 [-1.93, -0.00715]*	0.941 [-0.0904, 1.97]	5.23*** [Pet]	4.96* [Pet]	--
k_bacteria.p__Proteobacteria.c__Gammaproteobacteria.o__Enterobacterales.f__Enterobacteriaceae.g__	4.59 (2.09)	2.83 (1.26)	3.72 (1.59)	1.58e-05	-1.76 [-2.61, -0.909]***	-0.87 [-1.75, 0.0152]	0.888 [-0.0602, 1.84]	3.78*** [Pet]	--	3.45** [UIUC]
k_bacteria.p__Proteobacteria.c__Gammaproteobacteria.o__Enterobacterales.f__Enterobacteriaceae.g__.s__	4.57 (2.05)	2.73 (1.2)	3.3 (1.64)	1.36e-06	-1.84 [-2.66, -1.01]***	-1.27 [-2.13, -0.411]**	0.569 [-0.351, 1.49]	3.78*** [Pet]	3.51* [Pet]	3.45** [UIUC]
k_bacteria.p__Proteobacteria.c__Gammaproteobacteria.o__Enterobacterales.f__Enterobacteriaceae.g__Citrobacter	3.49 (2.28)	1.48 (1.39)	1.9 (1.77)	1.42e-06	-2 [-2.93, -1.07]***	-1.59 [-2.55, -0.618]***	0.417 [-0.621, 1.46]	4.03*** [Pet]	4.12** [Pet]	2.47* [UIUC]
k_bacteria.p__Proteobacteria.c__Gammaproteobacteria.o__Enterobacterales.f__Enterobacteriaceae.g__Citrobacter_A	3.03 (1.96)	1.39 (1.29)	1.82 (1.78)	1.59e-05	-1.64 [-2.48, -0.807]***	-1.21 [-2.08, -0.344]**	0.428 [-0.503, 1.36]	2.30*** [Pet]	2.05** [Pet]	--
k_bacteria.p__Proteobacteria.c__Gammaproteobacteria.o__Enterobacterales.f__Enterobacteriaceae.g__Citrobacter_A.s__Citrobacter_A_amalonaticus	2.9 (1.82)	1.1 (1.09)	1.52 (1.54)	8.87e-08	-1.8 [-2.54, -1.05]***	-1.38 [-2.15, -0.602]***	0.422 [-0.409, 1.25]	2.27*** [Pet]	2.17** [Pet]	--
k_bacteria.p__Proteobacteria.c__Gammaproteobacteria.o__Enterobacterales.f__Enterobacteriaceae.g__Citrobacter_A.s__Citrobacter_A_rodentium	2.01 (1.56)	0.592 (0.962)	1.2 (1.49)	1.13e-05	-1.42 [-2.1, -0.739]***	-0.812 [-1.52, -0.102]*	0.608 [-0.153, 1.37]	2.67*** [Pet]	--	2.53* [UIUC]
k_bacteria.p__Proteobacteria.c__Gammaproteobacteria.o__Enterobacterales.f__Enterobacteriaceae.g__Citrobacter.s__	2.32 (1.88)	0.339 (0.778)	1.11 (1.5)	1.28e-08	-1.98 [-2.72, -1.24]***	-1.21 [-1.98, -0.442]***	0.771 [-0.0503, 1.59]	3.23*** [Pet]	3.29*** [Pet]	3.46* [UIUC]
k_bacteria.p__Proteobacteria.c__Gammaproteobacteria.o__Enterobacterales.f__Enterobacteriaceae.g__Citrobacter.s__Citrobacter_braakii	2.58 (1.86)	0.75 (0.894)	1.31 (1.36)	3.72e-08	-1.83 [-2.55, -1.11]***	-1.27 [-2.02, -0.52]***	0.562 [-0.24, 1.36]	3.11*** [Pet]	2.99*** [Pet]	--
k_bacteria.p__Proteobacteria.c__Gammaproteobacteria.o__Enterobacterales.f__Enterobacteriaceae.g__Citrobacter.s__Citrobacter_freundii	2.21 (1.88)	0.642 (0.945)	1.27 (1.39)	7.4e-06	-1.57 [-2.31, -0.827]***	-0.941 [-1.71, -0.168]*	0.628 [-0.2, 1.46]	3.41*** [Pet]	--	2.87*** [UIUC]
k_bacteria.p__Proteobacteria.c__Gammaproteobacteria.o__Enterobacterales.f__Enterobacteriaceae.g__Citrobacter.s__Citrobacter_portucalensis	2.6 (1.88)	0.785 (1.03)	1.41 (1.44)	1.24e-07	-1.82 [-2.56, -1.08]***	-1.2 [-1.96, -0.428]***	0.622 [-0.201, 1.45]	3.71*** [Pet]	3.78*** [Pet]	2.77* [UIUC]
k_bacteria.p__Proteobacteria.c__Gammaproteobacteria.o__Enterobacterales.f__Enterobacteriaceae.g__Enterobacter	2.95 (1.76)	0.723 (1.3)	1.42 (1.48)	1.02e-10	-2.22 [-2.96, -1.49]***	-1.53 [-2.29, -0.767]***	0.692 [-0.125, 1.51]	2.61*** [Pet]	2.22*** [Pet]	3.26** [UIUC]
k_bacteria.p__Proteobacteria.c__Gammaproteobacteria.o__Enterobacterales.f__Enterobacteriaceae.g__Enterobacter.s__	2.08 (1.41)	0.116 (0.36)	0.732 (1.05)	1.49e-14	-1.97 [-2.5, -1.44]***	-1.35 [-1.9, -0.799]***	0.616 [0.025, 1.21]*	2.61*** [Pet]	2.22*** [Pet]	3.30** [UIUC]
k_bacteria.p__Proteobacteria.c__Gammaproteobacteria.o__Enterobacterales.f__Enterobacteriaceae.g__Escherichia	5.91 (2.18)	4.64 (1.53)	4.64 (2.09)	0.00107	-1.26 [-2.18, -0.339]**	-1.27 [-2.23, -0.305]**	-0.00526 [-1.04, 1.03]	5.17*** [Pet]	4.84* [Pet]	--
k_bacteria.p__Proteobacteria.c__Gammaproteobacteria.o__Enterobacterales.f__Enterobacteriaceae.g__Escherichia.s__	5.46 (2.29)	3.68 (1.5)	4.52 (1.95)	9.14e-05	-1.79 [-2.74, -0.836]***	-0.945 [-1.94, 0.0473]	0.843 [-0.22, 1.91]	4.82*** [Pet]	--	--
k_bacteria.p__Proteobacteria.c__Gammaproteobacteria.o__Enterobacterales.f__Enterobacteriaceae.g__Escherichia.s__Escherichia_albertii	3.53 (2.11)	1.8 (1.23)	2.57 (1.79)	1.9e-05	-1.73 [-2.58, -0.882]***	-0.966 [-1.85, -0.0787]*	0.767 [-0.183, 1.72]	2.98*** [Pet]	2.74* [Pet]	--
k_bacteria.p__Proteobacteria.c__Gammaproteobacteria.o__Enterobacterales.f__Enterobacteriaceae.g__Escherichia.s__Escherichia_coli	4.73 (2.19)	2.89 (1.28)	4.09 (1.88)	2.54e-05	-1.84 [-2.75, -0.93]***	-0.64 [-1.59, 0.309]	1.2 [0.184, 2.22]*	4.56*** [Pet]	--	4.21* [UIUC]
k_bacteria.p__Proteobacteria.c__Gammaproteobacteria.o__Enterobacterales.f__Enterobacteriaceae.g__Escherichia.s__Escherichia_coli_D	4.23 (2.35)	2.05 (1.19)	2.96 (2.15)	1.49e-06	-2.18 [-3.13, -1.22]***	-1.26 [-2.26, -0.269]**	0.912 [-0.155, 1.98]	4.20*** [Pet]	4.17** [Pet]	--
k_bacteria.p__Proteobacteria.c__Gammaproteobacteria.o__Enterobacterales.f__Enterobacteriaceae.g__Escherichia.s__Escherichia_dysenteriae	2.91 (1.9)	1.29 (1.12)	2.14 (1.76)	3.02e-05	-1.62 [-2.43, -0.812]***	-0.776 [-1.62, 0.0663]	0.844 [-0.0582, 1.75]	2.69*** [Pet]	--	--
k_bacteria.p__Proteobacteria.c__Gammaproteobacteria.o__Enterobacterales.f__Enterobacteriaceae.g__Escherichia.s__Escherichia_fergusonii	2.93 (1.72)	1.74 (1.32)	2.05 (1.66)	0.000798	-1.19 [-1.95, -0.423]***	-0.88 [-1.67, -0.0841]*	0.307 [-0.546, 1.16]	2.75*** [Pet]	2.65** [Pet]	--
k_bacteria.p__Proteobacteria.c__Gammaproteobacteria.o__Enterobacterales.f__Enterobacteriaceae.g__Escherichia.s__Escherichia_flexneri	4.94 (1.99)	3.97 (1.61)	4.16 (1.87)	0.0244	-0.967 [-1.86, -0.0729]*	-0.778 [-1.71, 0.154]	0.189 [-0.81, 1.19]	4.41*** [Pet]	--	--
k_bacteria.p__Proteobacteria.c__Gammaproteobacteria.o__Enterobacterales.f__Enterobacteriaceae.g__Escherichia.s__Escherichia_marmotae	2.97 (1.8)	1.48 (1.16)	1.91 (1.74)	2.27e-05	-1.5 [-2.26, -0.729]***	-1.06 [-1.86, -0.263]**	0.434 [-0.424, 1.29]	2.50*** [Pet]	--	--
k_bacteria.p__Proteobacteria.c__Gammaproteobacteria.o__Enterobacterales.f__Enterobacteriaceae.g__Escherichia.s__Escherichia_sp000208585	2.67 (1.8)	1.29 (1.23)	1.66 (1.56)	8.3e-05	-1.38 [-2.14, -0.615]***	-1.01 [-1.81, -0.217]**	0.365 [-0.488, 1.22]	2.44*** [Pet]	2.30** [Pet]	--
k_bacteria.p__Proteobacteria.c__Gammaproteobacteria.o__Enterobacterales.f__Enterobacteriaceae.g__Hafnia	2.03 (1.71)	0.406 (0.851)	0.578 (1.01)	6.26e-09	-1.62 [-2.27, -0.976]***	-1.45 [-2.12, -0.777]***	0.172 [-0.549, 0.892]	3.51*** [Pet]	3.52*** [Pet]	--
k_bacteria.p__Proteobacteria.c__Gammaproteobacteria.o__Enterobacterales.f__Enterobacteriaceae.g__Hafnia.s__Hafnia_paralvei	1.95 (1.7)	0.441 (1.05)	0.476 (0.827)	3.5e-08	-1.51 [-2.17, -0.852]***	-1.48 [-2.16, -0.789]***	0.0353 [-0.701, 0.772]	3.51*** [Pet]	3.52*** [Pet]	--
k_bacteria.p__Proteobacteria.c__Gammaproteobacteria.o__Enterobacterales.f__Enterobacteriaceae.g__Klebsiella	2.77 (1.82)	0.737 (1.18)	1.15 (1.42)	1.57e-09	-2.04 [-2.79, -1.29]***	-1.62 [-2.4, -0.841]***	0.415 [-0.421, 1.25]	2.82*** [Pet]	3.03** [Pet]	3.50* [UIUC]
k_bacteria.p__Proteobacteria.c__Gammaproteobacteria.o__Enterobacterales.f__Enterobacteriaceae.g__Klebsiella_B	2.13 (1.6)	0.734 (1.02)	0.943 (1.08)	6.09e-07	-1.39 [-2.03, -0.754]***	-1.18 [-1.85, -0.519]***	0.209 [-0.503, 0.921]	2.43*** [Pet]	--	3.80** [UIUC]
k_bacteria.p__Proteobacteria.c__Gammaproteobacteria.o__Enterobacterales.f__Enterobacteriaceae.g__Klebsiella_B.s__Klebsiella_B_aerogenes	2.24 (1.75)	0.505 (0.716)	1.15 (1.32)	4.23e-08	-1.73 [-2.41, -1.06]***	-1.09 [-1.79, -0.386]**	0.647 [-0.103, 1.4]	2.43*** [Pet]	--	3.82** [UIUC]
k_bacteria.p__Proteobacteria.c__Gammaproteobacteria.o__Enterobacterales.f__Enterobacteriaceae.g__Klebsiella.s__	1.71 (1.7)	0.0902 (0.27)	0.671 (1.18)	5.24e-08	-1.62 [-2.26, -0.986]***	-1.04 [-1.7, -0.379]***	0.581 [-0.129, 1.29]	2.82*** [Pet]	3.02** [Pet]	3.53* [UIUC]
k_bacteria.p__Proteobacteria.c__Gammaproteobacteria.o__Enterobacterales.f__Enterobacteriaceae.g__Proteus	2.79 (1.79)	0.935 (1.27)	1.02 (1.25)	2.07e-09	-1.86 [-2.59, -1.12]***	-1.77 [-2.54, -1.01]***	0.0864 [-0.734, 0.906]	3.10*** [Pet]	3.01*** [Pet]	--
k_bacteria.p__Proteobacteria.c__Gammaproteobacteria.o__Enterobacterales.f__Enterobacteriaceae.g__Proteus.s__Proteus_mirabilis	1.35 (1.81)	0.075 (0.3)	0.238 (0.696)	2.51e-06	-1.28 [-1.91, -0.652]***	-1.12 [-1.77, -0.463]***	0.163 [-0.537, 0.863]	3.08*** [Pet]	2.98** [Pet]	--
k_bacteria.p__Proteobacteria.c__Gammaproteobacteria.o__Enterobacterales.f__Enterobacteriaceae.g__Proteus.s__Proteus_vulgaris	2.22 (1.53)	0.727 (1.02)	0.992 (1.38)	3.82e-07	-1.5 [-2.16, -0.83]***	-1.23 [-1.92, -0.536]***	0.266 [-0.478, 1.01]	2.34*** [Pet]	2.19*** [Pet]	--
k_bacteria.p__Proteobacteria.c__Gammaproteobacteria.o__Enterobacterales.f__Enterobacteriaceae.g__Pseudocitrobacter	1.78 (1.59)	0.351 (0.963)	0.773 (1.14)	1.87e-06	-1.42 [-2.07, -0.775]***	-1 [-1.68, -0.326]**	0.422 [-0.303, 1.15]	2.66*** [Pet]	2.37* [Pet]	3.24** [UIUC]
k_bacteria.p__Proteobacteria.c__Gammaproteobacteria.o__Enterobacterales.f__Enterobacteriaceae.g__Pseudocitrobacter.s__Pseudocitrobacter_sp000330845	1.54 (1.43)	0.269 (0.694)	0.948 (1.3)	9.24e-06	-1.27 [-1.87, -0.673]***	-0.59 [-1.21, 0.0314]	0.679 [0.0133, 1.35]*	2.66*** [Pet]	--	3.17** [UIUC]
k_bacteria.p__Proteobacteria.c__Gammaproteobacteria.o__Enterobacterales.f__Enterobacteriaceae.g__Salmonella	2.65 (1.73)	1.43 (1.41)	1.32 (1.56)	8.75e-05	-1.23 [-2.02, -0.437]***	-1.33 [-2.15, -0.508]***	-0.104 [-0.986, 0.777]	2.53** [Pet]	2.73** [Pet]	--
k_bacteria.p__Proteobacteria.c__Gammaproteobacteria.o__Enterobacterales.f__Enterobacteriaceae.g__Salmonella.s__Salmonella_enterica	2.32 (1.61)	1.34 (1.35)	1.48 (1.63)	0.00426	-0.974 [-1.73, -0.221]**	-0.839 [-1.62, -0.0535]*	0.136 [-0.706, 0.977]	2.53** [Pet]	2.74** [Pet]	--
k_bacteria.p__Proteobacteria.c__Gammaproteobacteria.o__Enterobacterales.f__Enterobacteriaceae.g__Yersinia	2.53 (1.72)	1.08 (1.3)	1.45 (1.5)	4.22e-05	-1.44 [-2.22, -0.671]***	-1.08 [-1.88, -0.271]**	0.367 [-0.497, 1.23]	2.18*** [Pet]	--	--
k_bacteria.p__Proteobacteria.c__Gammaproteobacteria.o__Enterobacterales.f__Enterobacteriaceae.g__Yersinia.s__Yersinia_pestis	2.04 (1.61)	1.01 (1.25)	1.52 (1.58)	0.00537	-1.03 [-1.77, -0.287]**	-0.523 [-1.3, 0.25]	0.506 [-0.323, 1.34]	2.18*** [Pet]	--	--
k_bacteria.p__Proteobacteria.c__Gammaproteobacteria.o__Enterobacterales.f__Succinivibrionaceae	0.605 (1.29)	2.7 (1.61)	1.16 (1.57)	5.28e-11	2.09 [1.43, 2.76]***	0.552 [-0.137, 1.24]	-1.54 [-2.28, -0.803]***	2.71*** [Kennel]	--	2.60*** [Kennel]
k_bacteria.p__Proteobacteria.c__Gammaproteobacteria.o__Enterobacterales.f__Succinivibrionaceae.g__Anaerobiospirillum	0.359 (0.829)	2.11 (1.69)	0.847 (1.36)	1.42e-10	1.75 [1.19, 2.32]***	0.488 [-0.102, 1.08]	-1.26 [-1.9, -0.632]***	2.69*** [Kennel]	--	2.61*** [Kennel]
k_bacteria.p__Proteobacteria.c__Gammaproteobacteria.o__Enterobacterales.f__Succinivibrionaceae.g__Anaerobiospirillum.s__Anaerobiospirillum_succiniciproducens	0.347 (0.893)	1.98 (1.58)	0.613 (0.973)	2.02e-11	1.63 [1.12, 2.15]***	0.266 [-0.27, 0.803]	-1.37 [-1.94, -0.793]***	2.69*** [Kennel]	--	2.60*** [Kennel]
