# Supplementary material for: Beagle dogs living in household or controlled environments show different gut microbiome profiles when fed an identical diet or diet type
Source: Research Square preprint supplement (doi:10.21203/rs.3.rs-3167499/v1), 2023-07-24
Supplement: Supplementary file 3 [file 9a396b53dde3c6c8e63b4331.xlsx]

## Sheet: Sheet1
Table 1: Relative abundance of whole-genome shotgun reads mapping to phylum-level taxa expressed as median [interquartile range].
Taxa	All Samples			Fresh			Kibble
	Pet	Kennel	UIUC	Pet	Kennel	UIUC	Pet	Kennel	UIUC
p__Actinobacteriota	6.02 [0.22,18.47]	12.62 [6.79,18.66]	26.49 [5.99,60.33]	4.7 [0.17,17.27]	13.78 [4.08,23.81]	6.41 [2.37,20.85]	7.59 [0.39,18.55]	11.99 [9.13,15.65]	55.4 [38.22,62.36]
p__Bacteroidota	4.06 [0.44,11.86]	4.21 [1.25,13.15]	0.73 [0.08,2.36]	3.64 [0.56,10.27]	1.78 [0.95,5.37]	0.07 [0.02,0.11]	5.36 [0.43,15.4]	9.12 [3.48,15.72]	2.29 [1.49,5.05]
p__Bdellovibrionota	0 [0,0]	0 [0,0]	0 [0,0]	0 [0,0]	0 [0,0]	0 [0,0]	0 [0,0]	0 [0,0]	0 [0,0]
p__Campylobacterota	0 [0,0]	0 [0,0]	0 [0,0]	0 [0,0]	0 [0,0]	0 [0,0]	0 [0,0]	0 [0,0]	0 [0,0]
p__Firmicutes	8.24 [3.12,25.33]	28.06 [10.3,43.15]	17.72 [6.12,30.52]	6.77 [2.73,22.32]	10.53 [5.82,20.89]	30.55 [6.42,59.1]	18.21 [3.92,25.71]	38.14 [29.36,56.46]	10.5 [6.45,20.4]
p__Firmicutes_A	12.17 [4.33,25.4]	41.52 [25.28,64.55]	22.11 [12.32,28.19]	12.31 [5.75,23.26]	65.47 [33.42,74.63]	13.82 [7.33,21.67]	12.04 [3.64,30.49]	33.34 [19.24,45.08]	23.09 [21.23,41.56]
p__Firmicutes_B	0 [0,0]	0 [0,0]	0 [0,0]	0 [0,0]	0 [0,0]	0 [0,0]	0 [0,0]	0 [0,0]	0 [0,0]
p__Firmicutes_C	0.02 [0,0.24]	0.07 [0.01,0.62]	0 [0,0.02]	0.01 [0,0.05]	0.01 [0,0.02]	0 [0,0]	0.08 [0.01,0.72]	0.62 [0.16,0.83]	0.01 [0,0.05]
p__Firmicutes_D	0 [0,0]	0 [0,0]	0 [0,0]	0 [0,0]	0 [0,0]	0 [0,0]	0 [0,0]	0 [0,0]	0 [0,0]
p__Fusobacteriota	0 [0,0.1]	0.15 [0.04,0.4]	0.03 [0.01,0.09]	0 [0,0.03]	0.16 [0.02,0.85]	0.01 [0,0.03]	0.01 [0,0.15]	0.12 [0.06,0.31]	0.06 [0.03,0.11]
p__Proteobacteria	33.02 [1.33,71.33]	0.48 [0.12,0.84]	0.87 [0.26,38.72]	43.32 [6.23,76.93]	0.48 [0.07,0.87]	39.15 [4.86,45.49]	16.09 [0.23,45.42]	0.46 [0.21,0.73]	0.37 [0.2,0.84]
p__Verrucomicrobiota	0 [0,0]	0 [0,0]	0 [0,0]	0 [0,0]	0 [0,0]	0 [0,0]	0 [0,0]	0 [0,0]	0 [0,0]
p__Verrucomicrobiota_A	0 [0,0]	0 [0,0]	0 [0,0]	0 [0,0]	0 [0,0]	0 [0,0]	0 [0,0]	0 [0,0]	0 [0,0]
